1 **Stability of association between *Arabidopsis thaliana* and *Pseudomonas***  
2 **pathogens over evolutionary time scales**

3

4

5 Talia L. Karasov<sup>1</sup>, Juliana Almario<sup>2,3\*</sup>, Claudia Friedemann<sup>1\*</sup>, Wei Ding<sup>1</sup>, Michael Giolai<sup>1,4</sup>, Darren Heavens<sup>4</sup>,  
6 Sonja Kersten<sup>1</sup>, Derek S. Lundberg<sup>1</sup>, Manuela Neumann<sup>1</sup>, Julian Regalado<sup>1</sup>, Richard A. Neher<sup>5</sup>, Eric Kemen<sup>2,3</sup>,  
7 Detlef Weigel<sup>1,6</sup>

8

9 <sup>1</sup>Department of Molecular Biology, Max Planck Institute for Developmental Biology, 72076 Tübingen, Germany

10 <sup>2</sup>Max Planck Research Group Fungal Biodiversity, Max Planck Institute for Plant Breeding Research, Carl-von-  
11 Linné Weg 10, 50829 Cologne, Germany

12 <sup>3</sup>Institute of Plant Biochemistry, ZMBP, University of Tübingen, 72076 Tübingen, Germany

13 <sup>4</sup>Earlham Institute, Norwich Research Park Innovation Centre, Colney Lane, Norwich NR4 7UZ, UK

14 <sup>5</sup>University of Basel, Klingelbergstrasse 50 / 70, 4056 Basel, Switzerland

15 <sup>6</sup>Correspondence: [weigel@tue.mpg.de](mailto:weigel@tue.mpg.de)

16

17 \*These authors contributed equally

18

19

## Summary

20 Crop disease outbreaks are often associated with clonal expansions of single pathogenic lineages. To determine  
21 whether similar boom-and-bust scenarios hold for wild plant pathogens, we carried out a multi-year multi-site  
22 survey of *Pseudomonas* in the natural host *Arabidopsis thaliana*. The most common *Pseudomonas* lineage  
23 corresponded to a pathogenic clade present in all sites. Sequencing of 1,524 *Pseudomonas* genomes revealed  
24 this lineage to have diversified approximately 300,000 years ago, containing dozens of genetically distinct  
25 pathogenic sublineages. These sublineages have expanded in parallel within the same populations and are  
26 differentiated both at the level of gene content and disease phenotype. Such coexistence of diverse sublineages  
27 indicates that in contrast to crop systems, no single strain has been able to overtake these *A. thaliana*  
28 populations in the recent past. Our results suggest that the selective pressures acting on a plant pathogen in  
29 wild hosts may be more complex than those in agricultural systems.

## 30 Introduction

31 In agricultural and clinical settings, pathogenic colonizations are frequently associated with expansions of single  
32 or a few genetically identical microbial lineages (Butler et al., 2013; Cai et al., 2011; Kolmer, 2005; Park et al.,  
33 2015; Stukenbrock and McDonald, 2008; Yoshida et al., 2013). The conditions that lead to such epidemics—such  
34 as reduced host genetic diversity (Zhu et al., 2000), absence of competing microbial communities (Brown et al.,  
35 2013) or high transmission rates (Park et al., 2015)—are, however, by no means a universal feature of  
36 pathogenic infections. Instead, many, if not most, pathogens can colonize host populations that are both  
37 genetically diverse and that can accommodate a diversity of other microbes (Barrett et al., 2009; Falkinham et  
38 al., 2015; Woolhouse et al., 2001).

39 Factors that drive pathogen success in such more complex situations are less well understood than for  
40 clonal epidemics. For example, if a pathogen species persists at high numbers in non-host environments, does  
41 each host become infected by a different pathogen strain? Or does a multitude of genetically distinct pathogens  
42 infect each host? And do different colonizing strains use disparate mechanisms to become established even  
43 within genetically similar host individuals? The answers to these questions inform on how (and if) a host  
44 population can evolve partial or even complete pathogen resistance (Anderson and May, 1982; Barrett et al.,  
45 2009; Karasov et al., 2014a; Laine et al., 2011). Several studies over the past 20 years have attempted to infer  
46 the distributions of non-epidemic pathogens in both host and non-host environments (Falkinham et al., 2015;  
47 Wiehlmann et al., 2007). These studies, which have observed a range of different patterns, are unfortunately  
48 often limited to the historic strains that are available, and the conclusions vary for different collections, even of  
49 the same pathogen species (Pirnay et al., 2009).

50 Questions of pathogen epidemiology are of particular relevance when considering the genus  
51 *Pseudomonas*, which includes pathogens and commensals of both animals and plants (Baltrus et al., 2017) and is

52 among the most abundant genera in plant leaf tissue. This genus belongs to the Gram-negative  
53 gammaproteobacteria, with well over a hundred recognized species (Gomila et al., 2015). The three taxa most  
54 commonly found on plants are *P. syringae* and *P. viridiflava* in the *P. syringae* complex (Bartoli et al., 2014) and *P.*  
55 *fluorescens* (Garrido-Sanz et al., 2016). The abundance of *Pseudomonas* can have a large impact on plant fitness  
56 (Balestra et al., 2009; Gao et al., 2009; Yunis et al., 1980), and several putatively host-adapted lineages of this  
57 genus (Baltrus et al., 2011, 2012) can cause agricultural disease epidemics. Despite the damage they can do to  
58 plants, *Pseudomonas* pathogens are not obligatory biotrophs: surveys of *Pseudomonas* in environmental and non-  
59 host habitats have revealed distribution patterns typical for opportunistic microbes (Bartoli et al., 2014; Morris  
60 et al., 2008, 2010), with genetically divergent lineages not uncommonly found in the same host populations  
61 (Barrett et al., 2011; Karasov et al., 2017; Kniskern et al., 2011).

62 Motivated by wanting to understand how the distribution of a common plant pathogen differs between  
63 agricultural and non-agricultural situations, we have begun to elucidate the epidemiology of *Pseudomonas* strains  
64 within and between populations of a non-agricultural host. *Arabidopsis thaliana* is a globally distributed wild plant  
65 capable of colonizing poor substrates as well as fertilised soils (Weigel, 2012). *Arabidopsis thaliana* populations  
66 across the globe are hosts to *Pseudomonas*, and several of the most abundant *Pseudomonas* strains are  
67 pathogenic on *A. thaliana*, even though they are likely not specialized on this species as a host (Barrett et al.,  
68 2011; Bodenhausen et al., 2014; Cai et al., 2011; Jakob et al., 2002, 2007; Kniskern et al., 2011).

69 Here we report a broad-scale survey of *Pseudomonas* operational taxonomical units (OTUs) based on  
70 16S rDNA sequences in six *A. thaliana* populations from South-Western Germany, over six seasons. Through  
71 this survey we first identified a single OTU that was consistently dominating in individual plants, across  
72 populations and across seasons. Through subsequent isolation and sequencing of the genomes of 1,524  
73 *Pseudomonas* isolates we uncovered extensive diversity within this pathogenic OTU, diversity that is much  
74 older than *A. thaliana* in this area. Taken together, this makes for a colonization pattern that differs substantially  
75 from what is typically observed for crop pathogens. The observation of a single dominant and temporally  
76 persistent *Pseudomonas* lineage in several host populations is at first glance reminiscent of successful pathogens  
77 in agricultural systems. However, in stark contrast to many crop pathogens, this *Pseudomonas* pathogen can  
78 apparently persist as a diverse metapopulation over long periods, without a single sublineage becoming  
79 dominant.

## 80 **Results**

### 81 **Dozens of *Pseudomonas* OTUs persist in *A. thaliana* populations**

82 *Pseudomonas* bacteria are abundant in *A. thaliana* populations from South-Western Germany (Aglar et al., 2016),  
83 but whether the same lineages are found in these different populations and whether the abundant lineages are  
84 pathogenic was not known. To obtain a first understanding of *Pseudomonas* diversity on *A. thaliana*, we surveyed  
85 6S rDNA diversity across six host populations in spring and fall of three consecutive years. We sampled both

86

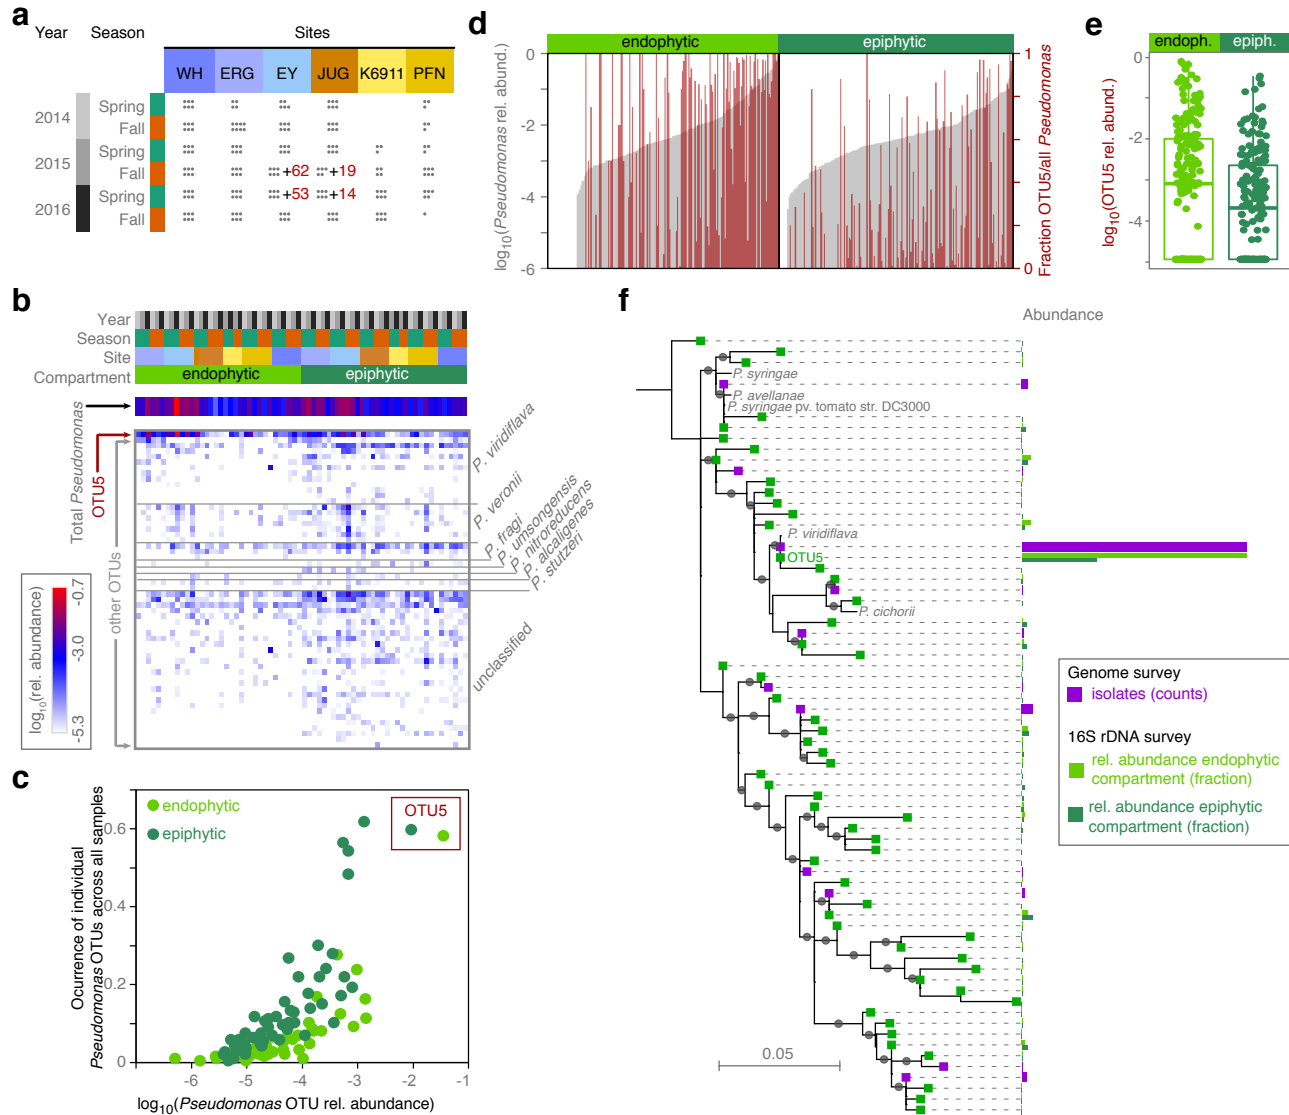

87

88 **Fig. 1. Natural *Pseudomonas* populations in *A. thaliana* leaves are dominated by the OTU5 lineage.**  
 89 (a) Overview of 16S rDNA survey of epi- and endophytic compartments of *A. thaliana* plants (dots indicate sampled  
 90 plants). Numbers of individuals from which *Pseudomonas* isolates were cultured and metagenome analysis was performed  
 91 in parallel are indicated in red. (b) Heat map of relative abundance of 56 *Pseudomonas* OTUs in the 16S rDNA survey.  
 92 Color key to samples on top according to panel (a). *Pseudomonas* species assignments on the right. *P. veronii*, *P. fragi* and *P.*  
 93 *umsongensis* belong to the *P. fluorescence* complex, *P. nitroreducens* and *P. alcaligenes* to the *P. aeruginosa* complex. (c)  
 94 Correlation between occurrence across all samples and average relative abundance within samples of the 56 *Pseudomonas*  
 95 OTUs in the endo- and epiphytic compartments. (d) *Pseudomonas* abundance (grey bars) and percentage of *Pseudomonas*  
 96 reads belonging to OTU5 (red bars), in the endo- and epiphytic compartments. (e) OTU5 is significantly more abundant in  
 97 the endophytic compartment (Wilcoxon test,  $P = 0.02$ ). (f) Maximum-likelihood phylogenetic tree illustrating the similarity  
 98 between amplicon sequencing derived and isolation derived *Pseudomonas* OTUs defined by distance clustering at 99%  
 99 sequence identity of the v3–v4 regions of the 16S rDNA. For isolates, exact 16S rDNA sequences were used, for  
 100 amplicon sequencing OTU the most common representative sequence was used. Grey dots on branches indicate  
 101 bootstrap values  $>0.7$ . Color bars represent the relative abundance or the number of isolates. The most abundant  
 102 *Pseudomonas* OTU in both the endophytic and epiphytic compartments, OTU5, was identical in sequence to the most  
 103 abundant sequence observed among isolates and to a *P. viridiflava* reference genome (NCBI AY597278.1/AY597280.1). See  
 104 also Fig. S1 and S2.  
 105



106 the epiphytic and endophytic microbiome of rosettes and sequenced the v3-v4 region of 16S rDNA (Fig. 1a,  
107 Fig. S1a, Table S1). As expected, *Pseudomonas* was common, occurring in 92% of samples (97% of the epiphytic  
108 and 88% of the endophytic samples) and representing on average 3% of the total bacterial community. The  
109 genus was found at similar densities inside and on the surface of leaves (ANOVA,  $P > 0.05$ ) (Fig. S1b), indicating  
110 no preferential colonization of either niche. While we did not detect an effect of sampling time on relative  
111 abundance (ANOVA,  $P > 0.05$ ), abundance varied across sites (ANOVA,  $R^2 = 12.8\%$ ,  $P = 10^{-10}$ ; Fig. S1c), suggesting  
112 that certain site-specific characteristics may be particularly conducive to *Pseudomonas* proliferation.

113 By clustering of *Pseudomonas* 16S rDNA reads at 99% sequence similarity, we could distinguish 56  
114 OTUs (Fig. 1b). The 99% threshold for distance-based clustering of reads resulted in OTU patterns more  
115 congruent with a whole genome-phylogeny than the more widely used 97% sequence similarity (Fig. S2). While  
116 half of the *Pseudomonas* OTUs could not be classified at the species level, 13 were classified as *P. viridiflava*,  
117 which belongs to the *P. syringae* complex, including the most abundant OTU, OTU5. The other classifiable  
118 OTUs belonged to the *P. fluorescens*, *P. aeruginosa* and the *P. stutzeri* species complexes (Fig. 1b).

119 To understand the factors shaping *Pseudomonas* assemblages, we studied variation in OTU presence  
120 and relative abundances as an indication of *Pseudomonas* population structure. Permutational multivariate  
121 analysis of variance (PerMANOVA on Bray-Curtis distances,  $P < 0.05$ ) indicated that differences between host  
122 individuals were associated primarily with interactions between site, leaf niche and sampling time (20.0%  
123 explained variance), with a smaller percentage associated with each factor independently such as site (4.0%  
124 explained variance), leaf niche (2.3%) or sampling time (2.7%). An important difference between leaf niches was  
125 that endophytic *Pseudomonas* populations were 2.6 times less diverse than epiphytic populations (Wilcoxon  
126 test,  $P < 10^{-16}$ ) (Fig. S1d), pointing to selective bottlenecks inside the leaf being stronger.

### 127 **A single lineage dominates *Pseudomonas* populations in *A. thaliana* leaves**

128 *Pseudomonas viridiflava* OTU5 was overall the most common *Pseudomonas* OTU across samples (Fig. 1b),  
129 occurring in 59% of epiphytic and 58% of endophytic samples. Across all samples, OTU5 accounted for almost  
130 half of reads in the endophytic compartment (48%, range 0-99.9% in each sample), and it was the most  
131 abundant endophytic *Pseudomonas* OTU in 52% of samples (Fig. 1c). The dominance of OTU5 was less  
132 pronounced in the epiphytic samples, where it averaged 23% of all reads (range 0-99.9%), being the most  
133 abundant OTU in only 23% of samples. This observation indicates an enrichment of this OTU in the endophytic  
134 over the epiphytic compartment (Wilcoxon test  $P = 0.02$ , paired Wilcoxon test  $P = 7.4 \times 10^{-9}$ ) (Fig. 1d). In  
135 conjunction with the reduced *Pseudomonas* diversity in the endophytic compartment, this is evidence for OTU5  
136 members being particularly successful endophytic colonizers of *A. thaliana*.

137 16S rDNA amplicon reads reveal the relative abundance of microbes, but they do not inform on the  
138 absolute abundance of microbial cells in a plant, what we term the 'microbial load'. The latter is perhaps a  
139 more informative readout of the selective pressure exerted by a single microbial taxon than the relative  
140 abundance of a taxon among all microbes. A pathogen might dominate the microbiota, but unless it reaches a  
141 certain abundance, there might not be a marked decrease in host fitness (Duchmann et al., 1995; Schneider and

142 Ayres, 2008; Vaughn et al., 2000). The importance  
143 of absolute microbial load has recently come into  
144 focus of human gut microbiome analyses as well  
145 (Vandeputte et al., 2017).

146 To determine whether *Pseudomonas*  
147 diversity was related to overall microbial load, we  
148 used metagenome shotgun sequencing to quantify  
149 total microbial colonization. We returned to two of  
150 the previously sampled populations (Fig. 1a; Fig.  
151 S1a), collected and extracted genomic DNA from  
152 entire, washed leaf rosettes, and performed whole-  
153 genome shotgun sequencing on 192 plants. The  
154 same DNA was also used for 16S rDNA amplicon  
155 analysis to call OTUs. We mapped Illumina  
156 sequencing reads against all bacterial genomes in  
157 GenBank and against the *A. thaliana* reference  
158 genome, and determined the ratio of bacterial to  
159 plant reads. We calculated the correlation of  
160 microbial load, which varied substantially across the  
161 192 plants (Fig. 2a), with each of the 6,715 OTUs  
162 detected in at least one sample. Because OTUs  
163 were called on 16S rDNA amplicon sequences, but

164 microbial load was assessed on metagenomic reads, the two assays provided independent measurements of  
165 relative and absolute microbe abundance. Among all OTUs, OTU5 was the second most highly correlated with  
166 total microbial load (Fig. 2b,c; Pearson correlation coefficient  $R=0.41$ ,  $q\text{-value}=7\times 10^{-5}$ ), indicating that the  
167 strains represented by OTU5 are not only the most common *Pseudomonas* strains in these plants, but also that  
168 they are either major drivers or beneficiaries of microbial infection in these plants.

169

### 170 **OTU5 comprises many genetically distinct strains**

171 While OTU classification based on 16S rDNA and metagenomic assignment can be indicative of the genus or  
172 species-level identity of a microbe, genetically and phenotypically diverse strains of a genus will often be  
173 clustered together as a single OTU (Moeller et al., 2016). To discern genetic differentiation within OTU5, we  
174 therefore wanted to compare the complete genomes of OTU5 strains. From the same plants in which we had  
175 analyzed the metagenomes, we cultured and isolated between 1 and 34 *Pseudomonas* colonies (mean=11 per  
176 plant, median=12). We then sequenced and assembled *de novo* the full genomes of 1,611 *Pseudomonas* isolates  
177 (assembly pipeline and statistics in Fig. S3). Eighty-seven genomes with poor coverage, abnormal assembly

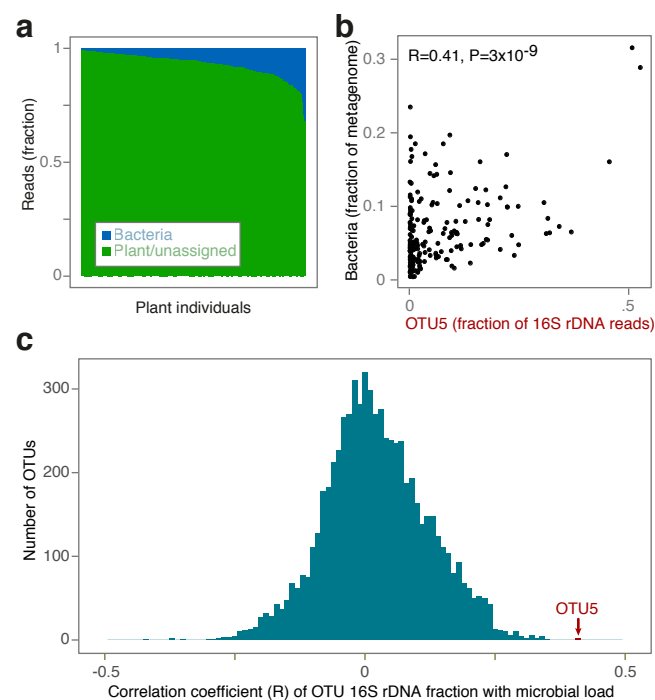

**Fig. 2. The most abundant OTU, OTU5, is correlated with microbial load.** (a) Bacterial and plant fraction of metagenome shotgun sequencing reads in 192 plants. (b) Correlation between fraction of bacterial reads in metagenome data and relative abundance of OTU5 in 16S rDNA amplicons from the same 192 samples. (c) Distribution of Pearson correlation coefficients between microbial loads as inferred from fraction of bacterial reads and OTU abundances (as shown for OTU5 in panel (b)). The correlation coefficient for OTU5 abundance is the second highest correlation among 6,715 OTUs detected across all samples. See also Fig. S2!!

178 characteristics or incoherent genome-wide sequence divergence were removed from further analysis. The  
179 remaining 1,524 genomes were 99.5% complete, as estimated with published methods (Simão et al., 2015),  
180 containing on average 5,347 predicted genes (standard deviation 284). Extraction of 16S rDNA sequences from  
181 the whole genome assemblies demonstrated that the vast majority of all isolates, 1,355, belonged to the OTU5  
182 lineage, as defined previously by amplicon sequencing.

183 Maximum-likelihood (ML) whole-genome phylogenies (Ding et al., 2018) were constructed from the  
184 concatenation of 807 genes that classified as the aligned soft core genome of our *Pseudomonas* collection.  
185 Because bacteria undergo homologous recombination, the branch lengths of the ML whole-genome tree may  
186 not properly reflect the branch lengths of vertically inherited genes, but the overall topology is expected to  
187 remain consistent (Hedge and Wilson, 2014). The  
188 1,524-genome phylogeny revealed hundreds of  
189 isolates that were nearly or completely identical  
190 across the core genome to at least one other  
191 isolate. Using a similarity cutoff of 99.9967%  
192 sequence identity (corresponding to a SNP  
193 approximately every 30,000 bp across the core  
194 genome based on distance in the ML tree), the  
195 1,524 isolates collapsed into 189 distinct  
196 *Pseudomonas* strains (Fig. 3a). In the whole-genome  
197 tree, 1,355 OTU5 isolates, comprising 107 distinct  
198 strains, formed a single monophyletic clade. One  
199 genome (p8.A2) in this clade differed in its 16S  
200 rDNA taxonomical assignment, but was later  
201 found to be likely a mixture of two genomes. In  
202 support of the 16S rDNA placement of OTU5  
203 within the *Pseudomonas* genus, the OTU5 clade is  
204 most closely related to *P. viridiflava* and *P. syringae*  
205 strains (Fig. 1f). Genetic differences between the  
206 identified strains were distributed through the  
207 genome, indicating that divergence between strains  
208 was not solely the result of a few importation  
209 events of divergent horizontally transferred  
210 material (Fig. 4a).

211 Comparing the position of strains on the phylogeny and their provenance identified several strains that  
212 were not only frequent colonizers across plants, but also persistent colonizers over time, each isolated in at  
213 least two consecutive seasons (a). Six OTU5 strains accounted for 51% of sequenced isolates, each with an

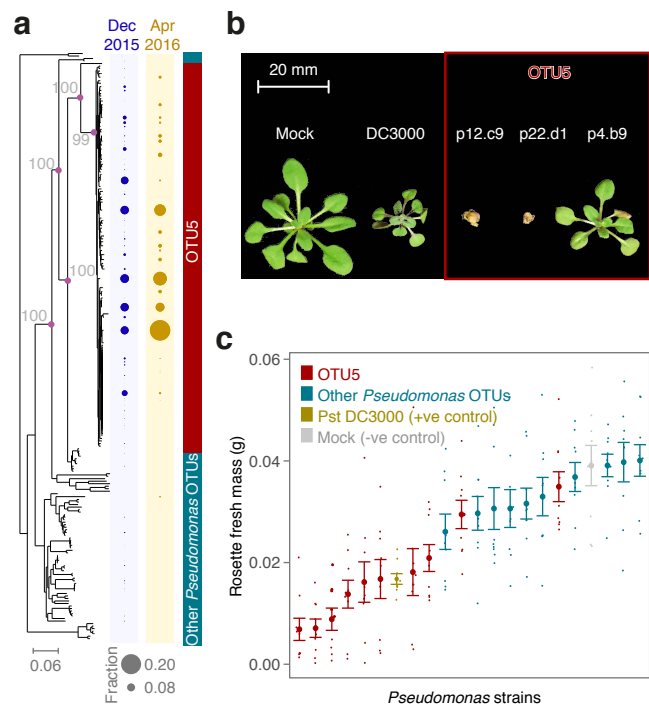

**Fig. 3. OTU5 is composed of multiple expanding lineages that are pathogenic.** (a) ML whole-genome phylogeny and abundance of strains in Eyach, Germany, in December 2015 and April 2016. Diameters of circles on the right indicate relative abundance across all isolates from that season. Purple circles at nodes relevant for OTU5 classification and grey numbers indicate support with 100 bootstrap trials. (b) Examples of OTU5 strains that can reduce growth and even cause obvious disease symptoms in gnotobiotic hosts. (c) Quantification of effect of drip infection on growth of plants. Pst DC3000 was used as positive control. The negative control did not contain bacteria. See also Fig. S2 and S5.

214 overall frequency of between 4-10%, with several found in over 20% of plants. In contrast, no strain outside of  
215 OTU5 exceeded an overall frequency of 5%. Generally, non-OTU5 strains were much less likely to be  
216 represented by multiple isolates and were very rarely observed in both seasons sampled.

217

### 218 **OTU5 primarily comprises pathogenic strains, but with distinct phenotypes**

219 The *P. syringae*/*P. viridiflava* complex, to which OTU5 belongs, contains many well-known plant pathogens—  
220 although not all *P. syringae* complex strains are pathogenic, with some lacking the canonical machinery required  
221 for virulence (Barrett et al., 2011; Clarke et al., 2010). Because some infection characteristics are determined  
222 by the presence of a single or few genes, even closely related strains of the same species can cause diverse  
223 types of disease (Barrett et al., 2011; Nowell et al., 2016). Given the known phenotypic variability within and  
224 between *Pseudomonas* species, 16S rDNA sequences  
225 alone did not inform on the pathogenic potential of  
226 the OTU5 strains.

227 To determine directly the virulence—which  
228 we define here as the ability to cause disease—of  
229 diverse OTU5 isolates, we drip-inoculated 26 of  
230 them on seedlings of *Eyach* 15-2, an *A. thaliana*  
231 genotype common at one of our sampling sites in  
232 Southwestern Germany (Bombliès et al., 2010) (Fig.  
233 3b-c, Fig. 4a; Fig. S5). Twenty-five of the 26 tested  
234 OTU5 strains reduced plant growth significantly in  
235 comparison to uninfected plants, but only two of ten  
236 randomly-chosen non-OTU5 *Pseudomonas* strains did  
237 so (ANOVA,  $P < 0.05$ ). The tomato pathogen *P.*  
238 *syringae* pv. tomato (Pst) DC3000, which is known to  
239 be highly virulent on *A. thaliana* (Velásquez et al.,  
240 2017), reduced growth to a similar extent as several  
241 OTU5 strains, with some OTU5 strains being even  
242 more virulent and killing seedlings outright (Fig. 3b,c).  
243 Treatment of seedlings with boiled, dead bacteria did  
244 not reduce plant growth for any of the five isolates  
245 tested (ANOVA,  $P > 0.25$  for all), indicating that the  
246 reduction in plant growth was not due to run-away  
247 immunity triggered by the initial inoculation, but was  
248 indeed caused by proliferation of living bacteria.

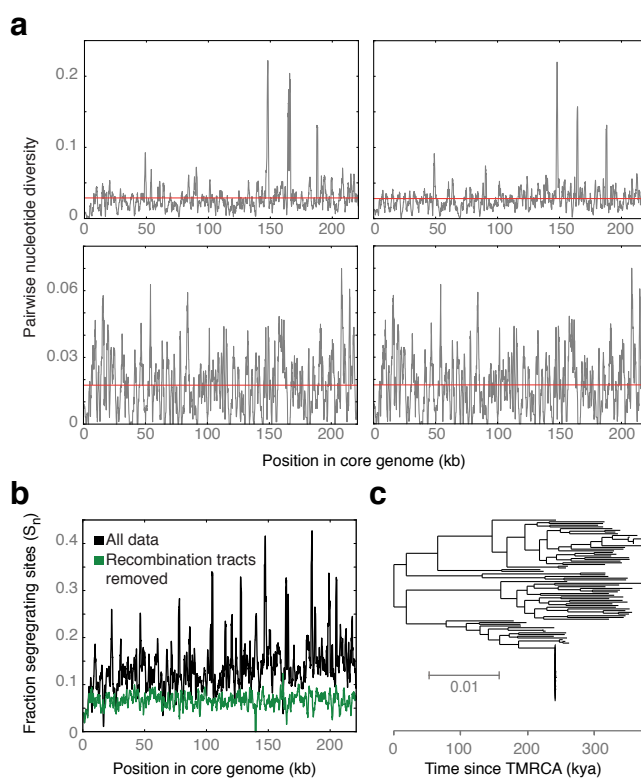

**Fig 4. Genome-wide divergence and dating of OTU5 strains.** (a) Pairwise nucleotide diversity in 1000 bp sliding windows. One randomly chosen OTU5 reference strain was separately compared with four different other OTU5 strains. (b) Genome-wide distribution of Segregating Sites ( $S_n$ ) in OTU5, calculated in 1000 bp sliding windows. Putative recombination tracts were removed from the core genome alignment to calculate the coalescence of OTU5. This removal reduced the fraction of segregating sites by half (0.14 vs. 0.07). (c) The TMRCA of 107 isolates representing the 107 identified OTU5 strains as calculated using a substitution rate estimated in ref. (McCann et al., 2017). See also Fig. S3.

249 From the clear phenotypic stratification of strains we conclude that the majority of OTU5 strains is virulent.  
250 These experimental results in conjunction with the observed correlation of OTU5 with microbial load in the  
251 field, established with metagenomic methods, both point to OTU5 as being responsible for some of the most  
252 persistent bacterial pathogen pressures in the sampled *A. thaliana* populations.

253

### 254 **Strains within OTU5 diverged over 300,000 years ago**

255 Several surveys of crop pathogen epidemics have indicated that few, if not single strains frequently drive such  
256 outbreaks, with the dominant strains often changing over the course of a few years or decades (Cai et al.,  
257 2011; Kolmer, 2005; McCann et al., 2017; Stukenbrock and McDonald, 2008; Yoshida et al., 2013, 2014). An  
258 example of these dynamics has been well illustrated by Cai and colleagues (Cai et al., 2011) who followed the  
259 expansion of *P. syringae* strains in agricultural tomato populations during the 20<sup>th</sup> century, finding that at nearly  
260 all time points only one or two strains were present at high frequency. Isolates from the lineage that was most  
261 abundant over the last sixty years—to which today over 90% of assayed isolates belong—differed at only a few  
262 dozen SNPs throughout the genome, indicative of a common ancestor as recently as just a few decades ago.

263 Our comparative analysis of the OTU5 lineage from *A. thaliana* had shown that OTU5 isolates were  
264 much more diverse, with over 10% of positions (27,217/221,628 bp) in the OTU5 core genome being  
265 polymorphic. However, the age of diversification cannot be inferred directly from a concatenated whole  
266 genome tree (Hedge and Wilson, 2014) because recombination events with horizontally transferred DNA can  
267 increase the sequence divergence between strains, thereby elongating branches and inflating estimates of the  
268 time to the most recent common ancestor (TMRCA). To prevent the overestimation of the TMRCA of OTU5,  
269 it was necessary to correct for the effects of recombination. Such correction can lead instead to  
270 underestimation of branch lengths (Hedge and Wilson, 2014); we found this acceptable, because our goal was  
271 to assess a minimum lower bound for TMRCA for the strains of interest. We removed 7,646 recombination  
272 tracts from the whole-genome alignments after having inferred recombination sites in the core genome using  
273 ClonalFrameML (Didelot and Wilson, 2015) (Fig. 4b). Removal of recombination tracts reduced the number of  
274 segregating sites by approximately 50%. As expected, the remaining polymorphic sites were distributed more  
275 evenly throughout the genome (Fig. 4b). For inference of neutral coalescence, it is ideal to consider  
276 substitutions at fourfold degenerate sites. However, limiting the analysis to fourfold degenerate sites after  
277 subsetting to a strict core genome and removal of putative recombination sites left too few segregating sites to  
278 make robust phylogenetic partitions. Hence, we performed subsequent calculations on all non-recombined  
279 sites.

280 McCann and colleagues (McCann et al., 2017) have used temporal collections of a clonally spreading  
281 kiwi pathogen to estimate the rate of substitution in a *Pseudomonas* lineage related to OTU5. Using their point  
282 estimate of  $8.7 \times 10^{-8}$  substitutions per site per year, we estimated the TMRCA of the 107 OTU5 strains. The  
283 ML-tree of OTU5 strains with recombination events removed contained a median mid-point-root to tip  
284 distance of 0.026 (standard deviation=0.004). With the substitution rate estimated by McCann and colleagues



285 (McCann et al., 2017) this corresponds to a TMRCA estimate of 300,000 years (standard deviation of root-to-  
286 tip distances=46,000 years) (Fig. 4c).

287 Note that this is likely an underestimate of the TMRCA, due to removal of ancient homoplasies  
288 identified by ClonalframeML (Hedge and Wilson, 2014). Furthermore, the substitution rate estimate from  
289 McCann and colleagues (McCann et al., 2017) is likely higher than the long-term substitution rate relevant to  
290 OTU5 (Exposito-Alonso et al., 2018; Kryazhimskiy and Plotkin, 2008; Rocha et al., 2006). Nevertheless, from  
291 this data we can conclude that strains of OTU5 likely diverged from one another approximately 300,000 years  
292 ago, pre-dating the recolonization of Europe by *A. thaliana* from Southern refugia after the Last Glacial  
293 Maximum (1001 Genomes Consortium, 2016).

294

### 295 **Individual pathogenic strains often dominate in planta**

296 Since multiple isolates (between one and 34, with a  
297 median of 12) had been sequenced from most  
298 sampled plants, we could assess the frequency of  
299 specific strains not only across the entire  
300 population, but also within each individual host.  
301 Most plants (73.3%) were colonized by multiple  
302 strains. While similar numbers of distinct strains  
303 within and outside of OTU5 were represented in  
304 our population level survey (Fig. 3a), non-OTU5  
305 strains tended to be found at low frequencies in  
306 collections from individual plants (a,b). Of all OTUs,  
307 only OTU5 strains, most of which are pathogenic,  
308 were likely to partially or completely dominate, i.e.,  
309 reach frequencies above 50%, within a single plant  
310 (Fig. 5a,b).

311 Strain diversity per host individual not only  
312 differed between clades, but also between seasons,  
313 with the distribution of strain frequency per plant  
314 changing over time. We measured the Shannon  
315 Index  $H'$  (Hill, 1973) to compare strain diversity per  
316 plant across the two seasons in which we had  
317 sampled isolates. While the fall cohort tended to  
318 have been colonized by several strains  
319 simultaneously, plants in spring were characterized

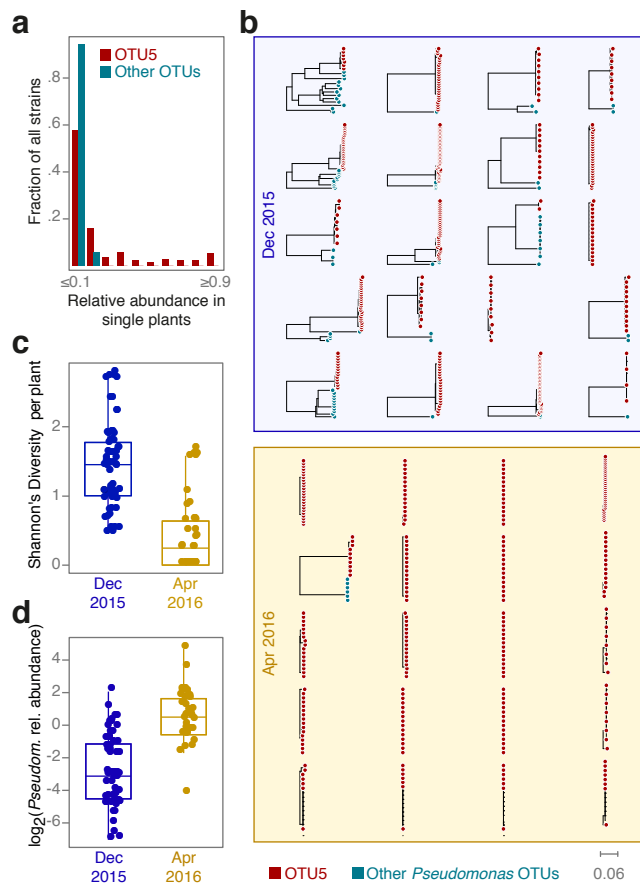

**Fig. 5. Different OTU5 strains expand clonally within different plants.** (a) Distribution of relative OTU5 and non-OTU5 strain abundances in single plants. (b) Phylogenetic trees of isolates collected from individual plants. (c) Strain diversity as function of season. (d) *Pseudomonas* load as function of season. For both (c, d), seasons are significantly different (Student's t-test,  $P=1.32 \times 10^{-15}$ ). Box-plots show median, first and third quartiles. Related to Fig. S4.

320 by reduced strain diversity (Fig. 5c) (Student's t-test,  $P=1.3 \times 10^{-15}$ ). One possible explanation for this change in  
321 strain frequencies is a local spring bloom of OTU5 populations. Plants sampled in spring carried a significantly  
322 higher absolute *Pseudomonas* load (Fig. 5d) (Student's t-test,  $P=1.0 \times 10^{-5}$ ), consistent with spring conditions  
323 favoring local OTU5 proliferation.

324

### 325 **Gene content differentiation of the pathogen clade OTU5**

326 The abundance of OTU5 as well as its enrichment in the endophytic over the epiphytic compartment indicated  
327 that this lineage colonizes *A. thaliana* more effectively than do related OTUs. Whether this success is the result  
328 of expansion in the plant, or host filtering of colonizers (Costello et al., 2012), is unclear, and we were curious  
329 what endows OTU5 strains with capacity to apparently outcompete other *Pseudomonas* lineages and to  
330 dominate in populations and in individual plants. To begin to answer this question, we sought to investigate a  
331 potential common genetic basis. To this end, we assessed the distribution of ortholog groups across the  
332 genomes of all *Pseudomonas* isolates including OTU5 using panX (Ding et al., 2018) (Fig. 6). From a presence-  
333 absence matrix in the pan-genome analysis one can immediately distinguish OTU5 lineages from non-OTU5  
334 lineages. Nine hundred and fourteen genes are conserved (>90% of genomes) within OTU5, but are much  
335 more rarely found outside this OTU, in fewer than 10% of non-OTU5 strains. Most of the conserved genes,  
336 59%, encode proteins without known function ("hypothetical proteins").

337

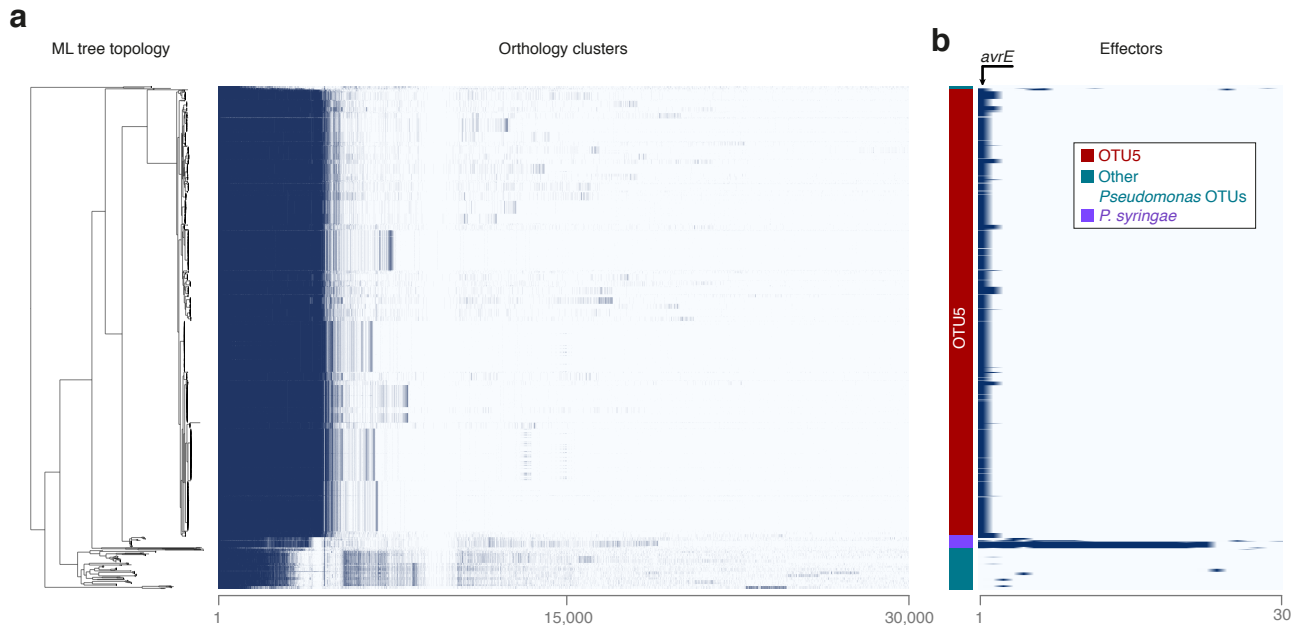

338

339 **Fig. 6. OTU5 strains vary in gene content but share an effector.** (a) ML tree topology of 1,524 isolates and  
340 presence (dark blue) or absence (light blue) of the 30,000 most common orthologs as inferred with panX (Ding et al.,  
341 2018). OTU5 strains share 914 ortholog groups that are found at less than 10% frequency outside OTU5. (b)  
342 Presence/absence of 30 effector homologs. Only *avrE* homologs are present in more than 50 isolates. Related to Fig. S6.

343

344 To successfully colonize their hosts, microbes often deploy toxins, phytohormones and effectors that  
345 are secreted by the bacteria into host cells or the apoplast. To determine whether production of these



346 compounds is likely to differ within OTU5 or between OTU5 and other clades, we generated a custom  
347 database of all effector genes and structural genes or enzymes for compounds known to be associated with  
348 host colonization in the genus *Pseudomonas*. We then used this database to independently annotate the effector  
349 as well as phytohormone and toxin biosynthesis gene content of each isolate (Fig. S6, Table S2).

350 OTU5 strains lacked all known genes for coronatine and syringomycin/syringopeptin synthesis, but  
351 auxin synthesis modules were found in almost all isolates (including isolates outside of OTU5). Genes for  
352 pectate lyase synthesis were broadly conserved both in and outside of OTU5 (Fig. S6). The *hrp-hrc* gene cluster,  
353 which encodes the type III secretion system (T3SS) along with effectors and several other proteins involved in  
354 pathogenicity (Alfano et al., 2000), is largely conserved across OTU5 isolates, with OTU5 alleles being most  
355 similar to the *hrp-hrc* clusters of previously sequenced *P. viridiflava* strains (Araki et al., 2006). We note that our  
356 search for plant-associated toxins and enzymes is not yet exhaustive. For example, other plant microbes deploy  
357 enzymes that can degrade the cell walls of their hosts (Almario et al., 2017), but such pathways have yet to be  
358 identified in *Pseudomonas*. Plants can detect microbes both through the presence of effector molecules and  
359 through microbe associated molecular patterns (MAMP). One such well-studied MAMP important in the  
360 *Pseudomonas-Arabidopsis* pathosystem is the flg22 peptide in flagellin (Gómez-Gómez et al., 1999). Isolates  
361 within OTU5 encode two major flg22 variants, which are highly divergent from one another (Table S2).

362 Effector proteins can increase bacterial fitness both through the suppression of the host immune  
363 system or through active promotion of proliferation in the plant (Chen et al., 2010; Xin et al., 2016) and are  
364 thought to be at the forefront of the coevolutionary interaction with the plant immune system (Karasov et al.,  
365 2014b). Only one gene for an effector homolog was broadly conserved across OTU5, *avrE*. It was shared with  
366 other *P. syringae* type isolates (Dillion et al., 2017), but found rarely outside this group. *avrE* encodes an effector  
367 that leads to increased humidity of the extracellular environment inside the plant, the apoplast (Xin et al.,  
368 2016). Experimental manipulation of apoplast humidity has shown that it is central to bacterial proliferation  
369 within the host. The most abundant *avrE* allele identified in our study is most similar to that previously  
370 observed in other *P. viridiflava* strains (Araki et al., 2006), with less similarity to the allele in the well-studied  
371 pathogen Pst DC3000 (Fig. S6). We thus conclude that the *avrE* homolog we identified in OTU5 is likely  
372 important for the success of OTU5 in the *A. thaliana* environment.

## 373 **Discussion**

374 In the field of human microbiome and health, an understanding of how pathogen colonization differs between  
375 simplified clinical settings and more complex environments outside the clinic, which are often distinguished by  
376 levels of antibiotic treatment, has led to important innovations in disease treatment (Bakken et al., 2011).  
377 Understanding differences between pathogen colonization and evolution in natural versus agricultural systems  
378 may similarly lead to innovations that reduce pathogen pressure in agriculture (Hu et al., 2016). Much can be  
379 learned about the course of pathogen colonization and evolution by examining pathogen population diversity

380 and demography (Hershberg et al., 2008; Yoshida et al., 2013). For example, whether pathogen expansions in  
381 host populations are composed of single, genetically monomorphic strains or instead comprise numerous  
382 genetically divergent strains can indicate whether the successful pathogen lineage is recently  
383 introduced/evolved, or has persisted over long time periods. Pathogen diversity is not only an indicator of the  
384 colonization process, but the diversity itself will also influence the course of colonization and the evolution of  
385 resistance in host populations (Karasov et al., 2014b).

386 In this study, we conducted a large-scale survey of *A. thaliana* leaves across populations and seasons to  
387 determine the most abundant OTUs of *Pseudomonas*, which includes important *A. thaliana* foliar pathogens.  
388 While we found a single OTU to be by far the most abundant *Pseudomonas* OTU across populations, this  
389 lineage, OTU5, is genetically diverse and consists of dozens, if not hundreds, of strains, diverged by  
390 approximately 300,000 years, with similar abilities to colonize the *A. thaliana* host. We were surprised to find a  
391 single dominant *Pseudomonas* lineage in the study area, given that wild *A. thaliana* populations can be colonized  
392 by a diversity of *Pseudomonas* pathogenic species (Jakob et al., 2002; Kniskern et al., 2011). We note, though,  
393 that while the OTU5 strains share many genetic features, they are not functionally synonymous--instead they  
394 are differentiated both at the level of gene content and the level of virulence. An important question for the  
395 future will be in how many other regions OTU5 is the dominant colonizer of *A. thaliana*, and how its genetic  
396 diversity is geographically structured across the entire host range.

397 The genetic diversity of OTU5 that we observed in this study stands in stark contrast to the  
398 monomorphic, recent pathogen spreads observed in typical agricultural epidemic systems (Cai et al., 2011;  
399 Wichmann et al., 2005). There are several non-mutually exclusive explanations for this. Industrial agricultural  
400 fields are often planted with one or a few plant genotypes, and environmental variation in these fields is  
401 reduced by fertilization prior to planting. The resulting uniformity of the field and host environment is known  
402 to influence the microbiota (Figuerola et al., 2015; Zhu et al., 2000), and to promote the expansions of single  
403 pathogens (Zhu et al., 2000). While we believe this to be the most likely explanation for the difference  
404 between our study system and agricultural settings, another possibility is that the diverse pathogenic  
405 expansions we observe in *A. thaliana* populations also occur in crop populations, but that such expansions may  
406 have gone unnoticed because their impact may be small in comparison to the monomorphic crop epidemics.  
407 Both theory (Leggett et al., 2013; Regoes et al., 2000) and observations (Ebert, 1998) have detailed scenarios in  
408 which specialized pathogens (such as those on crops) will proliferate to higher abundance in their hosts than  
409 will generalist pathogens.

410 Most studies of crop pathogen evolution have centered on the loss or gain of a single or a few  
411 virulence factors that subvert recognition by the host. Many instances of rapid turnover of virulence factors  
412 have been documented (Baltrus et al., 2011; Godfrey et al., 2011; Jackson et al., 2000), even within the span of  
413 a few dozen generations. In contrast, in the *A. thaliana* system, we observe long-term stability of the *avrE*  
414 effector gene. The long-term success of OTU5 suggests that genetic factors leading to the success of divergent  
415 strains are likely to be conserved across these strains. Beyond the molecular mechanism of *avrE*-dependent

416 virulence, a growing number of studies has demonstrated that *avrE* may be central to the success of several  
417 plant pathogens and on several plant hosts. *avrE* homologs have not only been found in *Pseudomonas*, but have  
418 also been identified in other bacterial taxa, where they have been implicated in pathogenicity as well. DspE, an  
419 AvrE homolog in the plant pathogen *Erwinia amylovora*, functions similarly to AvrE (Bogdanove et al., 1998),  
420 pointing to many pathogens relying on the AvrE mechanism to enhance their fitness. Hosts often have evolved  
421 means to detect effector proteins (Chisholm et al., 2006). While several soybean cultivars can recognize the  
422 activity of AvrE (Kobayashi et al., 1989), gene-for-gene resistance to the *avrE*-containing Pst DC3000 model  
423 pathogen has so far not been found in *A. thaliana* (Velásquez et al., 2017) nor has quantitative resistance been  
424 observed, even though the effector reliably enhances colonization of Pst DC3000 (Xin et al., 2016).

425 It is reasonable to hypothesize that the plant host has evolved mechanisms that suppress the disease  
426 effect of OTU5. By itself, many OTU5 strains can reduce plant growth in gnotobiotic culture by more than 50%  
427 or even kill the plant. In natural populations, the pathogenic effect appears to be mitigated, since we isolated  
428 OTU5 strains from plants that did not appear to be heavily diseased. Indeed, several environmental and genetic  
429 factors are known to affect the the pathogenic effect of microbes including the physiological state of the plant  
430 (MacQueen and Bergelson, 2016) and the presence of other microbiota (Goss and Bergelson, 2007; Innerebner  
431 et al., 2011; Mendes et al., 2011). Understanding mechanisms of disease-mitigation in response to OTU5 will  
432 provide insight into how natural plant populations can blunt the effects of a common pathogen without  
433 instigating an arms race, and thereby suggest possible novel approaches to disease-protection in agriculture.

434

## 435 **Experimental Procedures**

### 436 **Sample collection**

437 For the 16S rDNA survey, *A. thaliana* samples were collected from five to six populations (sites) around  
438 Tübingen (Fig. S1a), in the fall and spring of 2014, 2015 and 2016; the number of sampled plants is indicated in  
439 Fig. 1a. For endophytic and epiphytic sample fractionation, whole rosettes were processed as described in ref.  
440 (Agler et al., 2016). Briefly, rosettes were washed once in water for 30 s, then in 3–5 mL of epiphyte wash  
441 solution (0.1% Triton X-100 in 1x TE buffer) for 1 min, before filtering the solution through a 0.2 µm  
442 nitrocellulose membrane filter (Whatman, Piscataway, NJ, USA) to collect the epiphytic fraction. For the  
443 endophytic fraction, the initial rosette was surface sterilized by washing with 80% ethanol for 15 seconds  
444 followed by 2% bleach (sodium hypochlorite) for 30 seconds, before rinsing three times with sterile autoclaved  
445 water. Samples were stored in screw cap tubes and directly frozen in dry ice. DNA extraction was conducted  
446 following (Agler et al., 2016), including a manual sample grinding step followed by a lysis step with SDS,  
447 Lysozyme and proteinase K, a DNA extraction step based on phenol-chloroform and a final DNA precipitation  
448 step with 100% ethanol.

449 Additional samples were collected from two of the six sites sampled for 16S rDNA, from Eyach, on  
450 December 11, 2015, and March 23, 2016, and from Kirchentellinsfurt on December 15, 2016, and March 31,  
451 2016. Whole rosettes were removed with sterile scissors and tweezers, and washed with deionized water.  
452 Two leaves were removed and independently processed, and the remaining rosette was flash-frozen on dry ice.  
453 The flash-frozen material was processed for metagenomic sequencing and 16S rDNA sequencing of the v4  
454 region. The removed leaves were placed on ice, washed in 70%-80% EtOH for 3-5 seconds to remove lightly-  
455 associated epiphytes. Sterilized plants were ground in 10 mM MgSO<sub>4</sub> and plated on King's Broth (KB) plates  
456 containing 100 µg/mL nitrofurantoin (Sigma). Plates were incubated at 25°C for two days, then placed at 4°C.  
457 Colonies were picked randomly from plates between 3-10 days after plating, grown in KB with nitrofurantoin  
458 overnight, then stored at -80°C in 15-30% glycerol.

459

#### 460 **16S v3-v4 amplicon sequencing**

461 The 16S v3-v4 region was amplified as described (Agler et al., 2016). Briefly, PCR reactions were conducted  
462 using a two-step protocol using blocking primers to decrease plant plastid 16S rDNA amplification. The first  
463 PCR was conducted with primers B341F / B806R in 20 µL reactions containing 0.2 µL Q5 high-fidelity DNA  
464 polymerase (New England Biolabs, Ipswich, MA, USA), 1x Q5 GC Buffer, 1x Q5 5x reaction buffer, 0.08 µM  
465 each of forward and reverse primer, 0.25 µM blocking primer and 225 µM dNTP. Template DNA was diluted  
466 1:1 in nuclease free water and 1 µL was added to the PCR. Triplicates were run in parallel on three  
467 independent thermocyclers (Bio-Rad Laboratories, Hercules, CA, USA); cycling conditions were 95 °C for 40 s,  
468 10 cycles of 95 °C for 35 s, 55 °C for 45 s, 72 °C for 15 s, and a final elongation at 72 °C for 3 min. The three  
469 reactions were combined and 10 µL were used for enzymatic cleanup with Antarctic phosphatase and  
470 Exonuclease I (New England Biolabs; 0.5 µL of each enzyme with 1.22 µL Antarctic phosphatase buffer at 37°C  
471 for 30 minutes followed by 80°C for 15 min). One microliter of cleaned PCR product was subsequently used in  
472 the second PCR with tagged primers including the Illumina adapters, in 50 µL containing 0.5 µL Q5 high-fidelity  
473 DNA polymerase (New England Biolabs), 1x Q5 GC Buffer, 1x Q5 5x reaction buffer, 0.16 µM each of forward  
474 and reverse primer and 200 µM dNTP. Cycling conditions were the same as for the first PCR except  
475 amplification was limited to 25 cycles. The final PCR products were cleaned using 1.8x volume Ampure XP  
476 purification beads (Beckman-Coulter, Brea, CA, USA) and eluted in 40 µL according to manufacturer  
477 instructions. Amplicons were quantified in duplicates with the PicoGreen system (Life Technologies, Carlsbad,  
478 CA, USA) and samples were combined in equimolar amounts into one library. The final libraries were cleaned  
479 with 0.8x volume Ampure XP purification beads and eluted into 40 µL. Libraries were prepared with the MiSeq  
480 Reagent Kit v3 for 2x300 bp paired-end reads (Illumina, San Diego, CA, USA). All the samples were analysed in  
481 9 runs on the same Illumina MiSeq instrument. Samples failing to produce enough reads on one run were re-  
482 sequenced and data from both runs were merged. The raw sequencing data was deposited at the National  
483 Center for Biotechnology Information (NCBI) Short Read Archive under BioProject PRJNA430505.

484

#### 485 **16S rDNA v3-v4 amplicon data analysis**

486 Amplicon data analysis was conducted in Mothur (Schloss et al., 2009). Paired-end reads were assembled  
487 (*make.contigs*) and reads with fewer than 5 bp overlap (full match) between the forward and reverse reads  
488 were discarded (*screen.seqs*). Reads were demultiplexed, filtered to a maximum of two mismatches with the tag  
489 sequence and a minimum of 100 bp in length. Chimeras were identified using Uchime in Mothur with more  
490 abundant sequences as reference (*chimera.uchime*, *abskew=1.9*). Sequences were clustered into OTUs at the 99  
491 % similarity threshold using VSEARCH in Mothur with the distance based clustering method (*dgc*) (*cluster*).  
492 Individual sequences were taxonomically classified using the rdp classifier method (*classify.seqs*, consensus  
493 confidence threshold set to 80) and the greengenes 16S rDNA database (13\_8 release). Each OTU was  
494 taxonomically classified (*classify.otu*, consensus confidence threshold set to 66), non-bacterial OTUs and OTUs  
495 with unknown taxonomy at the kingdom level were removed, as were low abundance OTUs (< 50 reads,  
496 *split.abund*). The confidence of OTU classification to the genus *Pseudomonas* was at least 97%. The most  
497 abundant sequence within each *Pseudomonas* OTU was selected as the OTU representative for phylogenetic  
498 analyses.

499 All statistical analyses were conducted in R 3.2.3 (Team and Others, 2010). In order to avoid zero  
500 values, relative abundance data was transformed using a  $\log(x+a)$  formula where  $a$  is the minimum value of the  
501 variable divided by two. Normality after transformation was assessed using Shapiro Wilk's normality test.  
502 Factors influencing *Pseudomonas* relative abundance were studied using multi-factorial ANOVA. When  
503 necessary, sites PFN and K6911 were excluded from the analysis, as they had missing data points (Fig. 1a).  
504 Mean differences were further verified with Wilcoxon's non-parametric test. Differences between *Pseudomonas*  
505 populations were assessed by calculating Bray-Curtis dissimilarities between samples using the "vegdist"  
506 function of the vegan package(Oksanen et al., 2007). These distances were used for principal coordinates  
507 analysis using the "dudi.pco" function of the ADE4 package(Dray et al., 2007), and for PERMANOVA to study  
508 the effect of different factors on the structure of *Pseudomonas* populations using the "Adonis" function of the  
509 vegan package.\

510 The 16S rDNA analysis of 192 plants in Eyach for which also metagenomic shotgun data were  
511 generated (see below) involved the amplification of the v4 region using the published primers 515F-806R  
512 (Schmidt et al., 1991) on an Illumina Miseq instrument with 2x250 bp paired end reads, which were  
513 subsequently merged. Sequences were clustered with uclust (Edgar, 2010), 99% identity, and taxonomically  
514 assigned using the RDP taxonomical assignment (Wang et al., 2007). 103 OTUs were assigned to the genus  
515 *Pseudomonas*. One OTU aligned with 100% identity over its entire length to OTU5, the most abundant OTU  
516 identified in the cross-population survey of the v3-v4 region described above.

517

## 518 **Metagenomic assessment of bacterial load**

519 Total DNA was extracted from flash-frozen rosettes by pre-grinding the frozen plant material to a powder  
520 using a mortar and pestle lined with sterile (autoclaved) aluminum foil and liquid nitrogen as needed to keep  
521 the sample frozen. Between 100 mg and 200 mg of plant material were then transferred with a sterile spatula  
522 to a 2 mL screw cap tube (Sarstedt) containing 0.5 mL of 1 mM garnet rocks (BioSpec). To this, 800  $\mu$ L of  
523 room temperature extraction buffer was added, containing 10 mM Tris pH 8.0, 10 mM EDTA, 100 mM NaCl,  
524 and 1.5% SDS. Lysis was performed in a FastPrep homogenizer at speed 6.0 for 1 minute. These tubes were  
525 spun at 20,000  $\times$  g for 5 minutes, and the supernatant was mixed with  $\frac{1}{3}$  volume of 5M KOAc in new tubes to  
526 precipitate the SDS. This precipitate was in turn spun at 20,000  $\times$  g for 5 minutes and DNA was purified from  
527 the resulting supernatant using Solid Phase Reversible Immobilisation (SPRI) beads (DeAngelis et al., 1995) at a  
528 bead to sample ratio of 1:2. DNA was quantified by PicoGreen, and libraries were constructed using a Nextera  
529 protocol modified to include smaller volumes (similar to (Baym et al., 2015)). Library molecules were size  
530 selected on a Blue Pippin instrument (Sage Science, Beverly, MA, USA). Multiplexed libraries were sequenced  
531 with 2x150 bp paired-end reads on an HiSeq3000 instrument (Illumina).

532 A significant challenge in the analysis of plant metagenomic sequences, is the proper removal of the  
533 host DNA. In order to remove host derived sequences, reads were mapped against the *A. thaliana* TAIR10  
534 reference genome with bwa mem(Li, 2013) using standard parameters. Subsequently, all read pairs flagged as  
535 unmapped were isolated from the main sequencing library with samtools (Li et al., 2009) as this represents the  
536 putatively "metagenomic" fraction.

537 Afterwards, this metagenomic fraction was mapped against the NCBI nr database (NCBI Resource  
538 Coordinators. Database resources of the National Center for Biotechnology Information 2016) with the blastx  
539 implementation of DIAMOND (Buchfink et al., 2015) using standard parameters.

540 Based on the reference sequences for which our metagenomic reads had significant alignments,  
541 taxonomic binning of sequencing data was performed with MEGAN via the naive LCA algorithm (Huson et al.,  
542 2007). Normalization of binned reads was performed with custom scripts and based on the number of reads  
543 binned into any given genus including reads assigned to species in that genus, taxa abundance was estimated.  
544 Metagenomic short read sequences were deposited in the European Nucleotide Archive (ENA) under the  
545 Primary Accession PRJEB24450.

546

## 547 **Whole-genome sequencing**

548 Bacterial DNA, both genomic and plasmid, was extracted using the Puregene DNA extraction kit (Invitrogen).  
549 Single bacterial colonies were grown overnight in Luria broth+100  $\mu$ g/mL Nitrofurantoin in 96-well plates.  
550 Plates were spun down for 10 minutes at 8000g, then the standard Puregene extraction protocol was followed.  
551 The capacity of the protocol to extract plasmid DNA was verified by extracting the DNA from a strain whose  
552 plasmids were previously identified (Pst DC3000)(Buell et al., 2003). Primers specific to these plasmids  
553 successfully amplified the puregene-extracted sample.



554 Genomic and plasmid DNA libraries for single bacteria and for whole plant metagenomes were  
555 constructed using a modified version of the Nextera protocol (Caruccio, 2011), modified to include smaller  
556 volumes (Rowan et al 2017). Briefly, 0.25-2ng of extracted DNA was sheared with the Nextera Tn5  
557 transpososome. Sheared DNA was amplified with custom primers for 14 cycles. Libraries were pooled and  
558 size-selected for the 300-700bp range on a Blue Pippin. Resulting libraries were then sequenced on the Illumina  
559 HiSeq3000. Coverage and assembly statistics are detailed in Fig. S2.

560

## 561 **Assembly and annotation**

562 Genomes were assembled using Spades (Bankevich et al., 2012) (standard parameters) and assembly errors  
563 corrected using Pilon (Walker et al., 2014) (standard parameters). Gene annotations were achieved using  
564 Prokka (Seemann, 2014) (standard parameters). Those genomes with N50<25kbp or less than 3000 annotated  
565 genes were deemed to be of insufficient quality and were excluded from further analyses except for 19  
566 genomes sequenced in the second season. Distributions of gene number and assembly quality are displayed in  
567 Fig. S3. The number of missing genes per genome was assessed using BUSCO (Simão et al., 2015). Assembled  
568 genomes were deposited in the European Nucleotide Archive (ENA) under the Primary Accession  
569 PRJEB24450.

570 Because Prokka does not successfully identify several effectors, in addition to other genes involved in  
571 interactions with the host, we augmented the Prokka annotation with several additional annotation sets. We  
572 predicted genes on the raw genome FASTA sequences using AUGUSTUS-3.3 (Stanke and Waack, 2003) and –  
573 genemodel=partial –gff3=on –species=E\_coli\_K12 settings. The protein sequence of each predicted gene was  
574 extracted using a custom script.

575 We annotated effectors using BLASTP-2.2.31+ (Altschul et al., 1990) specifying the AUGUSTUS  
576 predicted proteomes as query input and the Hop database ([http://www.Pseudomonas-syringae.org/T3SS-  
577 Hops.xls](http://www.Pseudomonas-syringae.org/T3SS-Hops.xls)) as reference database. We filtered the BLASTP results with a 40% identity query to reference  
578 sequence threshold, a 60% alignment length threshold of query to reference sequence and a 60% length ratio  
579 threshold of query and reference sequence (empirically determined). Hits of interest were manually extracted  
580 and controlled using online BLASTP and NCBI conserved domain search.

581 Toxins and phytohormones were annotated using the same BLASTP settings as described for effectors.  
582 We used custom NCBI protein databases including a set of genes involved in the toxin synthesis pathway. A  
583 strain was scored as toxin pathway encoding if all selected components of a pathway were present. Hrp-hrc  
584 clusters were also annotated using the formerly described BLAST and filtering settings and *P. syringae pv tomato*  
585 *DC3000* and *P. viridiflava PNA 3.3* as reference sequences.

586

## 587 **Pan-genome analysis and phylogenetics**

588 The panX pan-genome pipeline was used to assign orthology clusters (Ding et al., 2018) and build alignments of  
589 these clusters that were then used for phylogenetic analysis in RAxML (Stamatakis et al., 2005). The



590 parameters used were the following: divide-and-conquer algorithm (-dmdc) was used on the diamond  
591 clustering, a subset size of 50 was used in the dmdc (-dcs 50), a core genome cutoff of 70% (-cg 0.7).

592 Whole-genome phylogenies of the strains were constructed using RAxML (Stamatakis et al., 2005)  
593 using the gamma model of rate heterogeneity and the generalized time reversible model of substitution. The  
594 phylogenies were built from all SNPS present in the concatenated core genomes of strains identified by panX.  
595 Eight-hundred and seven genes were considered as core. We performed 100 bootstrap replicates in RAxML to  
596 establish the confidence in the full tree.

597 Within the 1355 isolates belonging to OTU5, 107 distinct strains were represented. One  
598 representative of each strain was picked at random, then recombination importation events were identified  
599 among these 107 strains using ClonalFrameML (Didelot and Wilson, 2015). ClonalFrameML estimated a high  
600 recombination rate within OTU5, estimating that a substitution in the tree was six times more likely to result  
601 from a recombination event than a mutation event. Specifically, ClonalFrameML estimated the following  
602 parameters: the  $1/\delta$  parameter (inverse importation event tract length in bp) was estimated as  $7.79 \times 10^{-3}/\text{bp}$   
603 ( $\text{var}=2.18014^{-9}$ ) and the Posterior Mean ratio between the probability of recombination (R) and the nucleotide  
604 diversity,  $\theta$ , was  $R/\theta = 1.19$  ( $\text{var}=5.07 \times 10^{-5}$ ). The estimated sequence divergence between imported tracts and  
605 the acceptor genome  $v=0.04$  ( $\text{var}=1.13 \times 10^{-8}$ ). The relative effect of recombination over mutation  $r/m=(R/\theta) \times$   
606  $v \times \delta = 6.18$ . Recombination tracts were removed from the alignments, and the remaining putatively non-  
607 recombined strict core genes (present in all 107 genomes) were used for subsequent dating of coalescence.

608 To estimate the age of OTU5 we considered only those ortholog groups that were conserved across  
609 all 107 OTU5 strains. These orthologs were concatenated and ClonalFrameML (Didelot and Wilson, 2015) was  
610 used to identify recombination tracts that could inflate the branch length of members of the OTU as described  
611 above. TMRCA of the OTU was estimated by calculating the mid-point-root to tip sequence divergence for a  
612 representative of all 107 strains within OTU5, then dividing the median value of this distance by the neutral  
613 substitution rate (Kimura, 1968) (we used here the point estimate of  $8.7 \times 10^{-8}$  with our estimate of  $\text{sd}=6.0 \times 10^{-8}$   
614 (McCann et al., 2017)). While we consider all sites (degenerate and non-degenerate) in the putatively non-  
615 recombined core, in addition to the fact that substitution rate is likely inaccurate for the longer timescale  
616 analysed in the present study, both of these inaccuracies would likely lead to the underestimation of the age.

617

## 618 **Pathogenicity assays**

619 The plant genotype Eyach 15-2 (CS76399), collected from Eyach, Germany, was previously determined to  
620 represent a plant genetic background common to the geographical region. Seeds were sterilized by overnight  
621 incubation at  $-80^{\circ}\text{C}$ , then 4 hours of bleach treatment at room temperature (seeds in open 2 ml tube in a  
622 desiccator containing a beaker with 40 ml Chlorox and 1 ml HCl (32%)). The seeds were then stratified for  
623 three days at  $4^{\circ}\text{C}$  in the dark on  $1/2$  MS media. Plants were grown in 3-4 mL  $1/2$  MS medium in six-well plates in  
624 long-day (16 hours) at  $16^{\circ}\text{C}$ . 12-14 days after stratification, plants were infected with single bacterial strains.

625 Bacteria were grown overnight in Luria broth and the relevant antibiotic (either 10 µg/mL of  
626 Kanamycin or Nitrofurantoin), diluted 1:10 in the morning and grown for 2 additional hours until they entered  
627 log phase. The bacteria were pelleted at 3500 g, resuspended in 10 mM MgSO<sub>4</sub> to a concentration of  
628 OD<sub>600</sub>=0.01. 200 µl of bacteria were drip-inoculated with a pipette onto the whole rosette. Plates were sealed  
629 with parafilm and returned to the growth percival. Seven days after infection, whole rosettes were cut from  
630 the plant and fresh mass was assessed.

631 For growth assays of dead bacteria, we performed growth and dilution of bacteria as above, then  
632 boiled the final preparation at 95°C for 38 minutes. Plants were treated with the dead bacteria in the same  
633 manner as described above.

## 634 **Acknowledgements**

635 We thank Marek Kucka for methodological help with Tn5 transpososome purification, Julia Vorholt for  
636 recommendations on infection methods, Matthew Clark for providing protocols for amended Nextera  
637 methodology, Hernán Burbano for discussions, and Joy Bergelson, Jeff Dangl and Michael Werner for critical  
638 reading of the manuscript. Funding was provided by HFSP long-term fellowships (TLK, DSL), an EMBO LRTF  
639 (TLK), ERC AdG IMMUNEMESIS (DW) and the Max Planck Society (DW, EK).

## 640 **Author Contributions**

641 TLK, EK and DW devised the study. TLK, JA, CF, MG, SK, DSL, and MN performed the experiments, TLK, JA,  
642 WD, DSL, MG, JR, and RAN analyzed the data. DH advised on library preparation methods. RAN, EK and DW  
643 advised on data analysis. TLK, JA and DW wrote the manuscript with help from all authors.

## 644 **Declaration of Interests**

645 The authors declare no competing interests.

## 646 **References**

- 647 1001 Genomes Consortium (2016). 1,135 genomes reveal the global pattern of polymorphism in *Arabidopsis*  
648 *thaliana*. *Cell* 166, 481–491.
- 649 Agler, M.T., Ruhe, J., Kroll, S., Morhenn, C., Kim, S.-T., Weigel, D., and Kemen, E.M. (2016). Microbial Hub  
650 Taxa Link Host and Abiotic Factors to Plant Microbiome Variation. *PLoS Biol.* 14, e1002352.
- 651 Alfano, J.R., Charkowski, A.O., Deng, W.L., Badel, J.L., Petnicki-Ocwieja, T., van Dijk, K., and Collmer, A.  
652 (2000). The *Pseudomonas syringae* Hrp pathogenicity island has a tripartite mosaic structure composed  
653 of a cluster of type III secretion genes bounded by exchangeable effector and conserved effector loci

- 654 that contribute to parasitic fitness and pathogenicity in plants. *Proc. Natl. Acad. Sci. U. S. A.* *97*, 4856–  
655 4861.
- 656 Almario, J., Jeena, G., Wunder, J., Langen, G., Zuccaro, A., Coupland, G., and Bucher, M. (2017). Root-  
657 associated fungal microbiota of nonmycorrhizal *Arabidopsis thaliana* and its contribution to plant phosphorus  
658 nutrition. *Proc. Natl. Acad. Sci. U. S. A.* *114*, E9403–E9412.
- 659 Altschul, S.F., Gish, W., Miller, W., Myers, E.W., and Lipman, D.J. (1990). Basic local alignment search tool. *J.*  
660 *Mol. Biol.* *215*, 403–410.
- 661 Anderson, R.M., and May, R.M. (1982). Coevolution of hosts and parasites. *Parasitology* *85* (Pt 2), 411–426.
- 662 Araki, H., Tian, D., Goss, E.M., Jakob, K., Halldorsdottir, S.S., Kreitman, M., and Bergelson, J. (2006).  
663 Presence/absence polymorphism for alternative pathogenicity islands in *Pseudomonas viridiflava*, a  
664 pathogen of *Arabidopsis*. *Proc. Natl. Acad. Sci. U. S. A.* *103*, 5887–5892.
- 665 Bakken, J.S., Borody, T., Brandt, L.J., Brill, J.V., Demarco, D.C., Franzos, M.A., Kelly, C., Khoruts, A., Louie, T.,  
666 Martinelli, L.P., et al. (2011). Treating *Clostridium difficile* Infection With Fecal Microbiota  
667 Transplantation. *Clin. Gastroenterol. Hepatol.* *9*, 1044–1049.
- 668 Balestra, G.M., Mazzaglia, A., Quattrucci, A., Renzi, M., and Rossetti, A. (2009). Current status of bacterial  
669 canker spread on kiwifruit in Italy. *Australas. Plant Dis. Notes* *4*, 34–36.
- 670 Baltrus, D.A., Nishimura, M.T., Romanchuk, A., Chang, J.H., Mukhtar, M.S., Cherkis, K., Roach, J., Grant, S.R.,  
671 Jones, C.D., and Dangl, J.L. (2011). Dynamic evolution of pathogenicity revealed by sequencing and  
672 comparative genomics of 19 *Pseudomonas syringae* isolates. *PLoS Pathog.* *7*, e1002132.
- 673 Baltrus, D.A., Nishimura, M.T., Dougherty, K.M., Biswas, S., Mukhtar, M.S., Vicente, J., Holub, E.B., and Dangl,  
674 J.L. (2012). The molecular basis of host specialization in bean pathovars of *Pseudomonas syringae*. *Mol.*  
675 *Plant. Microbe. Interact.* *25*, 877–888.
- 676 Baltrus, D.A., McCann, H.C., and Guttman, D.S. (2017). Evolution, genomics and epidemiology of *Pseudomonas*  
677 *syringae*. *Mol. Plant Pathol.* *18*, 152–168.
- 678 Bankevich, A., Nurk, S., Antipov, D., Gurevich, A.A., Dvorkin, M., Kulikov, A.S., Lesin, V.M., Nikolenko, S.I.,  
679 Pham, S., Prjibelski, A.D., et al. (2012). SPAdes: a new genome assembly algorithm and its applications  
680 to single-cell sequencing. *J. Comput. Biol.* *19*, 455–477.
- 681 Barrett, L.G., Kniskern, J.M., Bodenhausen, N., Zhang, W., and Bergelson, J. (2009). Continua of specificity and  
682 virulence in plant host-pathogen interactions: causes and consequences. *New Phytol.* *183*, 513–529.
- 683 Barrett, L.G., Bell, T., Dwyer, G., and Bergelson, J. (2011). Cheating, trade-offs and the evolution of  
684 aggressiveness in a natural pathogen population. *Ecol. Lett.* *14*, 1149–1157.
- 685 Bartoli, C., Berge, O., Monteil, C.L., Guilbaud, C., Balestra, G.M., Varvaro, L., Jones, C., Dangl, J.L., Baltrus,  
686 D.A., Sands, D.C., et al. (2014). The *Pseudomonas viridiflava* phylogroups in the *P. syringae* species  
687 complex are characterized by genetic variability and phenotypic plasticity of pathogenicity-related traits.  
688 *Environ. Microbiol.* *16*, 2301–2315.
- 689 Baym, M., Kryazhimskiy, S., Lieberman, T.D., Chung, H., Desai, M.M., and Kishony, R. (2015). Inexpensive

- 690 multiplexed library preparation for megabase-sized genomes. *PLoS One* 10, e0128036.
- 691 Bodenhausen, N., Bortfeld-Miller, M., Ackermann, M., and Vorholt, J.A. (2014). A Synthetic Community  
692 Approach Reveals Plant Genotypes Affecting the Phyllosphere Microbiota. *PLoS Genet.* 10, e1004283.
- 693 Bogdanove, A.J., Kim, J.F., Wei, Z., Kolchinsky, P., Charkowski, A.O., Conlin, A.K., Collmer, A., and Beer, S.V.  
694 (1998). Homology and functional similarity of an hrp-linked pathogenicity locus, dspEF, of *Erwinia*  
695 *amylovora* and the avirulence locus *avrE* of *Pseudomonas syringae* pathovar tomato. *Proceedings of the*  
696 *National Academy of Sciences* 95, 1325–1330.
- 697 Bomblies, K., Yant, L., Laitinen, R.A., Kim, S.-T., Hollister, J.D., Warthmann, N., Fitz, J., and Weigel, D. (2010).  
698 Local-scale patterns of genetic variability, outcrossing, and spatial structure in natural stands of  
699 *Arabidopsis thaliana*. *PLoS Genet.* 6, e1000890.
- 700 Brown, K.A., Khanafer, N., Daneman, N., and Fisman, D.N. (2013). Meta-Analysis of Antibiotics and the Risk of  
701 Community-Associated *Clostridium difficile* Infection. *Antimicrob. Agents Chemother.* 57, 2326–2332.
- 702 Buchfink, B., Xie, C., and Huson, D.H. (2015). Fast and sensitive protein alignment using DIAMOND. *Nat.*  
703 *Methods* 12, 59–60.
- 704 Buell, C.R., Joardar, V., Lindeberg, M., Selengut, J., Paulsen, I.T., Gwinn, M.L., Dodson, R.J., Deboy, R.T., Durkin,  
705 A.S., Kolonay, J.F., et al. (2003). The complete genome sequence of the *Arabidopsis* and tomato  
706 pathogen *Pseudomonas syringae* pv. tomato DC3000. *Proc. Natl. Acad. Sci. U. S. A.* 100, 10181–10186.
- 707 Butler, M.I., Stockwell, P.A., Black, M.A., Day, R.C., Lamont, I.L., and Poulter, R.T.M. (2013). *Pseudomonas*  
708 *syringae* pv. *actinidiae* from recent outbreaks of kiwifruit bacterial canker belong to different clones  
709 that originated in China. *PLoS One* 8, e57464.
- 710 Cai, R., Lewis, J., Yan, S., Liu, H., Clarke, C.R., Campanile, F., Almeida, N.F., Studholme, D.J., Lindeberg, M.,  
711 Schneider, D., et al. (2011). The plant pathogen *Pseudomonas syringae* pv. tomato is genetically  
712 monomorphic and under strong selection to evade tomato immunity. *PLoS Pathog.* 7, e1002130.
- 713 Caruccio, N. (2011). Preparation of next-generation sequencing libraries using Nextera™ technology:  
714 simultaneous DNA fragmentation and adaptor tagging by in vitro transposition. *Methods Mol. Biol.* 733,  
715 241–255.
- 716 Chen, L.-Q., Hou, B.-H., Lalonde, S., Takanaga, H., Hartung, M.L., Qu, X.-Q., Guo, W.-J., Kim, J.-G.,  
717 Underwood, W., Chaudhuri, B., et al. (2010). Sugar transporters for intercellular exchange and  
718 nutrition of pathogens. *Nature* 468, 527–532.
- 719 Chisholm, S.T., Coaker, G., Day, B., and Staskawicz, B.J. (2006). Host-microbe interactions: shaping the  
720 evolution of the plant immune response. *Cell* 124, 803–814.
- 721 Clarke, C.R., Cai, R., Studholme, D.J., Guttman, D.S., and Vinatzer, B.A. (2010). *Pseudomonas syringae* strains  
722 naturally lacking the classical *P. syringae* hrp/hrc locus are common leaf colonizers equipped with an  
723 atypical type III secretion system. *Mol. Plant. Microbe. Interact.* 23, 198–210.
- 724 Costello, E.K., Stagaman, K., Dethlefsen, L., Bohannan, B.J.M., and Relman, D.A. (2012). The application of  
725 ecological theory toward an understanding of the human microbiome. *Science* 336, 1255–1262.

- 726 DeAngelis, M.M., Wang, D.G., and Hawkins, T.L. (1995). Solid-phase reversible immobilization for the isolation  
727 of PCR products. *Nucleic Acids Res.* *23*, 4742–4743.
- 728 Didelot, X., and Wilson, D.J. (2015). ClonalFrameML: Efficient Inference of Recombination in Whole Bacterial  
729 Genomes. *PLoS Comput. Biol.* *11*, e1004041.
- 730 Dillion, M.M., Thakur, S., Almeida, R.N.D., and Guttman, D.S. (2017). Recombination of ecologically and  
731 evolutionarily significant loci maintains genetic cohesion in the *Pseudomonas syringae* species complex.  
732 bioRxiv, doi: 10.1101/227413.
- 733 Ding, W., Baumdicker, F., and Neher, R.A. (2018). panX: pan-genome analysis and exploration. *Nucleic Acids*  
734 *Res.* *46*, e5.
- 735 Dray, S., Dufour, A.-B., and Others (2007). The ade4 package: implementing the duality diagram for ecologists.  
736 *J. Stat. Softw.* *22*, 1–20.
- 737 Duchmann, R., Kaiser, I., Hermann, E., Mayet, W., Ewe, K., and Meyer zum Büschenfelde, K.H. (1995).  
738 Tolerance exists towards resident intestinal flora but is broken in active inflammatory bowel disease  
739 (IBD). *Clin. Exp. Immunol.* *102*, 448–455.
- 740 Ebert, D. (1998). Experimental evolution of parasites. *Science* *282*, 1432–1436.
- 741 Edgar, R.C. (2010). Search and clustering orders of magnitude faster than BLAST. *Bioinformatics* *26*, 2460–  
742 2461.
- 743 Exposito-Alonso, M., Becker, C., Schuenemann, V.J., Reiter, E., Setzer, C., Slovak, R., Brachi, B., Hagemann, J.,  
744 Grimm, D.G., Jiahui, C., et al. (2018). The rate and effect of de novo mutations in a colonizing lineage of  
745 *Arabidopsis thaliana*. *PLoS Genet.* *in press*.
- 746 Falkinham, J.O., 3rd, Hilborn, E.D., Arduino, M.J., Pruden, A., and Edwards, M.A. (2015). Epidemiology and  
747 Ecology of Opportunistic Premise Plumbing Pathogens: *Legionella pneumophila*, *Mycobacterium avium*,  
748 and *Pseudomonas aeruginosa*. *Environ. Health Perspect.* *123*, 749–758.
- 749 Figuerola, E.L.M., Guerrero, L.D., Türkowsky, D., Wall, L.G., and Erijman, L. (2015). Crop monoculture rather  
750 than agriculture reduces the spatial turnover of soil bacterial communities at a regional scale. *Environ.*  
751 *Microbiol.* *17*, 678–688.
- 752 Gao, L., Roux, F., and Bergelson, J. (2009). Quantitative fitness effects of infection in a gene-for-gene system.  
753 *New Phytol.* *184*, 485–494.
- 754 Garrido-Sanz, D., Meier-Kolthoff, J.P., Göker, M., Martín, M., Rivilla, R., and Redondo-Nieto, M. (2016).  
755 Genomic and Genetic Diversity within the *Pseudomonas fluorescens* Complex. *PLoS One* *11*,  
756 e0150183.
- 757 Godfrey, S.A.C., Lovell, H.C., Mansfield, J.W., Corry, D.S., Jackson, R.W., and Arnold, D.L. (2011). The stealth  
758 episome: suppression of gene expression on the excised genomic island PPHGI-I from *Pseudomonas*  
759 *syringae* pv. *phaseolicola*. *PLoS Pathog.* *7*, e1002010.
- 760 Gómez-Gómez, L., Felix, G., and Boller, T. (1999). A single locus determines sensitivity to bacterial flagellin in  
761 *Arabidopsis thaliana*. *Plant J.* *18*, 277–284.

- 762 Gomila, M., Peña, A., Mulet, M., Lalucat, J., and García-Valdés, E. (2015). Phylogenomics and systematics in  
763 *Pseudomonas*. *Front. Microbiol.* 6, 214.
- 764 Goss, E.M., and Bergelson, J. (2007). Fitness consequences of infection of *Arabidopsis thaliana* with its natural  
765 bacterial pathogen *Pseudomonas viridiflava*. *Oecologia* 152, 71–81.
- 766 Hedge, J., and Wilson, D.J. (2014). Bacterial phylogenetic reconstruction from whole genomes is robust to  
767 recombination but demographic inference is not. *MBio* 5, e02158.
- 768 Hershberg, R., Lipatov, M., Small, P.M., Sheffer, H., Niemann, S., Homolka, S., Roach, J.C., Kremer, K., Petrov,  
769 D.A., Feldman, M.W., et al. (2008). High functional diversity in *Mycobacterium tuberculosis* driven by  
770 genetic drift and human demography. *PLoS Biol.* 6, e311.
- 771 Hill, M.O. (1973). Diversity and Evenness: A Unifying Notation and Its Consequences. *Ecology* 54, 427–432.
- 772 Hu, J., Wei, Z., Friman, V.-P., Gu, S.-H., Wang, X.-F., Eisenhauer, N., Yang, T.-J., Ma, J., Shen, Q.-R., Xu, Y.-C., et  
773 al. (2016). Probiotic Diversity Enhances Rhizosphere Microbiome Function and Plant Disease  
774 Suppression. *mBio* 7, e01790-16.
- 775 Huson, D.H., Auch, A.F., Qi, J., and Schuster, S.C. (2007). MEGAN analysis of metagenomic data. *Genome Res.*  
776 17, 377–386.
- 777 Innerebner, G., Knief, C., and Vorholt, J.A. (2011). Protection of *Arabidopsis thaliana* against leaf-pathogenic  
778 *Pseudomonas syringae* by *Sphingomonas* strains in a controlled model system. *Appl. Environ. Microbiol.*  
779 77, 3202–3210.
- 780 Jackson, R.W., Mansfield, J.W., Arnold, D.L., Sesma, A., Paynter, C.D., Murillo, J., Taylor, J.D., and Vivian, A.  
781 (2000). Excision from tRNA genes of a large chromosomal region, carrying *avrPphB*, associated with  
782 race change in the bean pathogen, *Pseudomonas syringae* pv. *phaseolicola*. *Mol. Microbiol.* 38, 186–197.
- 783 Jakob, K., Goss, E.M., Araki, H., Van, T., Kreitman, M., and Bergelson, J. (2002). *Pseudomonas viridiflava* and *P.*  
784 *syringae*--natural pathogens of *Arabidopsis thaliana*. *Mol. Plant. Microbe. Interact.* 15, 1195–1203.
- 785 Jakob, K., Kniskern, J.M., and Bergelson, J. (2007). The Role of Pectate Lyase and the Jasmonic Acid Defense  
786 Response in *Pseudomonas viridiflava* Virulence. *Mol. Plant. Microbe. Interact.* 20, 146–158.
- 787 Karasov, T.L., Kniskern, J.M., Gao, L., DeYoung, B.J., Ding, J., Dubiella, U., Lastra, R.O., Nallu, S., Roux, F., Innes,  
788 R.W., et al. (2014a). The long-term maintenance of a resistance polymorphism through diffuse  
789 interactions. *Nature* 512, 436–440.
- 790 Karasov, T.L., Horton, M.W., and Bergelson, J. (2014b). Genomic variability as a driver of plant-pathogen  
791 coevolution? *Curr. Opin. Plant Biol.* 18, 24–30.
- 792 Karasov, T.L., Barrett, L., Hershberg, R., and Bergelson, J. (2017). Similar levels of gene content variation  
793 observed for *Pseudomonas syringae* populations extracted from single and multiple host species. *PLoS*  
794 *One* 12, e0184195.
- 795 Kimura, M. (1968). Evolutionary rate at the molecular level. *Nature* 217, 624–626.
- 796 Kniskern, J.M., Barrett, L.G., and Bergelson, J. (2011). Maladaptation in wild populations of the generalist plant  
797 pathogen *Pseudomonas syringae*. *Evolution* 65, 818–830.



- 798 Kobayashi, D.Y., Tamaki, S.J., and Keen, N.T. (1989). Cloned avirulence genes from the tomato pathogen  
799 *Pseudomonas syringae* pv. tomato confer cultivar specificity on soybean. *Proc. Natl. Acad. Sci. U. S. A.*  
800 86, 157–161.
- 801 Kolmer, J.A. (2005). Tracking wheat rust on a continental scale. *Curr. Opin. Plant Biol.* 8, 441–449.
- 802 Kryazhimskiy, S., and Plotkin, J.B. (2008). The population genetics of dN/dS. *PLoS Genet.* 4, e1000304.
- 803 Laine, A.-L., Burdon, J.J., Dodds, P.N., and Thrall, P.H. (2011). Spatial variation in disease resistance: from  
804 molecules to metapopulations. *J. Ecol.* 99, 96–112.
- 805 Leggett, H.C., Buckling, A., Long, G.H., and Boots, M. (2013). Generalism and the evolution of parasite  
806 virulence. *Trends Ecol. Evol.* 28, 592–596.
- 807 Li, H. (2013). Aligning sequence reads, clone sequences and assembly contigs with BWA-MEM. arXiv  
808 1303.3997.
- 809 Li, H., Handsaker, B., Wysoker, A., Fennell, T., Ruan, J., Homer, N., Marth, G., Abecasis, G., Durbin, R., and  
810 1000 Genome Project Data Processing Subgroup (2009). The Sequence Alignment/Map format and  
811 SAMtools. *Bioinformatics* 25, 2078–2079.
- 812 MacQueen, A., and Bergelson, J. (2016). Modulation of R-gene expression across environments. *J. Exp. Bot.* 67,  
813 2093–2105.
- 814 McCann, H.C., Li, L., Liu, Y., Li, D., Pan, H., Zhong, C., Rikkerink, E.H.A., Templeton, M.D., Straub, C.,  
815 Colombi, E., et al. (2017). Origin and Evolution of the Kiwifruit Canker Pandemic. *Genome Biol. Evol.*  
816 9, 932–944.
- 817 Mendes, R., Kruijt, M., de Bruijn, I., Dekkers, E., van der Voort, M., Schneider, J.H.M., Piceno, Y.M., DeSantis,  
818 T.Z., Andersen, G.L., Bakker, P.A.H.M., et al. (2011). Deciphering the rhizosphere microbiome for  
819 disease-suppressive bacteria. *Science* 332, 1097–1100.
- 820 Moeller, A.H., Caro-Quintero, A., Mjungu, D., Georgiev, A.V., Lonsdorf, E.V., Muller, M.N., Pusey, A.E., Peeters,  
821 M., Hahn, B.H., and Ochman, H. (2016). Cospeciation of gut microbiota with hominids. *Science* 353,  
822 380–382.
- 823 Morris, C.E., Sands, D.C., Vinatzer, B.A., Glaux, C., Guilbaud, C., Buffière, A., Yan, S., Dominguez, H., and  
824 Thompson, B.M. (2008). The life history of the plant pathogen *Pseudomonas syringae* is linked to the  
825 water cycle. *ISME J.* 2, 321–334.
- 826 Morris, C.E., Sands, D.C., Vanneste, J.L., Montarry, J., Oakley, B., Guilbaud, C., and Glaux, C. (2010). Inferring  
827 the evolutionary history of the plant pathogen *Pseudomonas syringae* from its biogeography in  
828 headwaters of rivers in North America, Europe, and New Zealand. *MBio* 1.
- 829 Nowell, R.W., Laue, B.E., Sharp, P.M., and Green, S. (2016). Comparative genomics reveals genes significantly  
830 associated with woody hosts in the plant pathogen *Pseudomonas syringae*. *Mol. Plant Pathol.*
- 831 Oksanen, J., Kindt, R., Legendre, P., O'Hara, B., Stevens, M.H.H., Oksanen, M.J., and Suggests, M. (2007). The  
832 vegan package. *Community Ecology Package* 10, 631–637.
- 833 Park, D.J., Dudas, G., Wohl, S., Goba, A., Whitmer, S.L.M., Andersen, K.G., Sealfon, R.S., Ladner, J.T.,



- 834 Kugelman, J.R., Matranga, C.B., et al. (2015). Ebola Virus Epidemiology, Transmission, and Evolution  
835 during Seven Months in Sierra Leone. *Cell* 161, 1516–1526.
- 836 Pirnay, J.-P., Bilocq, F., Pot, B., Cornelis, P., Zizi, M., Van Eldere, J., Deschaght, P., Vaneechoutte, M., Jennes, S.,  
837 Pitt, T., et al. (2009). *Pseudomonas aeruginosa* Population Structure Revisited. *PLoS One* 4, e7740.
- 838 Regoes, R.R., Nowak, M.A., and Bonhoeffer, S. (2000). Evolution of virulence in a heterogeneous host  
839 population. *Evolution* 54, 64–71.
- 840 Rocha, E.P.C., Smith, J.M., Hurst, L.D., Holden, M.T.G., Cooper, J.E., Smith, N.H., and Feil, E.J. (2006).  
841 Comparisons of dN/dS are time dependent for closely related bacterial genomes. *J. Theor. Biol.* 239,  
842 226–235.
- 843 Schloss, P.D., Westcott, S.L., Ryabin, T., Hall, J.R., Hartmann, M., Hollister, E.B., Lesniewski, R.A., Oakley, B.B.,  
844 Parks, D.H., Robinson, C.J., et al. (2009). Introducing mothur: open-source, platform-independent,  
845 community-supported software for describing and comparing microbial communities. *Appl. Environ.*  
846 *Microbiol.* 75, 7537–7541.
- 847 Schmidt, T.M., DeLong, E.F., and Pace, N.R. (1991). Analysis of a marine picoplankton community by 16S rRNA  
848 gene cloning and sequencing. *J. Bacteriol.* 173, 4371–4378.
- 849 Schneider, D.S., and Ayres, J.S. (2008). Two ways to survive infection: what resistance and tolerance can teach  
850 us about treating infectious diseases. *Nat. Rev. Immunol.* 8, 889–895.
- 851 Seemann, T. (2014). Prokka: rapid prokaryotic genome annotation. *Bioinformatics* 30, 2068–2069.
- 852 Simão, F.A., Waterhouse, R.M., Ioannidis, P., Kriventseva, E.V., and Zdobnov, E.M. (2015). BUSCO: assessing  
853 genome assembly and annotation completeness with single-copy orthologs. *Bioinformatics* 31, 3210–  
854 3212.
- 855 Stamatakis, A., Ludwig, T., and Meier, H. (2005). RAxML-III: a fast program for maximum likelihood-based  
856 inference of large phylogenetic trees. *Bioinformatics* 21, 456–463.
- 857 Stanke, M., and Waack, S. (2003). Gene prediction with a hidden Markov model and a new intron submodel.  
858 *Bioinformatics* 19 Suppl 2, ii215–ii225.
- 859 Stukenbrock, E.H., and McDonald, B.A. (2008). The origins of plant pathogens in agro-ecosystems. *Annu. Rev.*  
860 *Phytopathol.* 46, 75–100.
- 861 Team, R.C., and Others (2010). R: A language and environment for statistical computing. R Foundation for  
862 Statistical Computing, Vienna, Austria (ISBN 3--900051--07--0, URL: <http://www.R-project.org>).
- 863 Vandeputte, D., Kathagen, G., D'hoë, K., Vieira-Silva, S., Valles-Colomer, M., Sabino, J., Wang, J., Tito, R.Y., De  
864 Commer, L., Darzi, Y., et al. (2017). Quantitative microbiome profiling links gut community variation to  
865 microbial load. *Nature* 551, 507–511.
- 866 Vaughn, D.W., Green, S., Kalayanarooj, S., Innis, B.L., Nimmannitya, S., Suntayakorn, S., Endy, T.P.,  
867 Raengsakulrach, B., Rothman, A.L., Ennis, F.A., et al. (2000). Dengue viremia titer, antibody response  
868 pattern, and virus serotype correlate with disease severity. *J. Infect. Dis.* 181, 2–9.
- 869 Velásquez, A.C., Oney, M., Huot, B., Xu, S., and He, S.Y. (2017). Diverse mechanisms of resistance to

- 870 *Pseudomonas syringae* in a thousand natural accessions of *Arabidopsis thaliana*. *New Phytol.* *214*,  
871 1673–1687.
- 872 Wagner, M.R., Lundberg, D.S., Del Rio, T.G., Tringe, S.G., Dangl, J.L., and Mitchell-Olds, T. (2016). Host  
873 genotype and age shape the leaf and root microbiomes of a wild perennial plant. *Nat. Commun.* *7*,  
874 12151.
- 875 Walker, B.J., Abeel, T., Shea, T., Priest, M., Abouelliel, A., Sakthikumar, S., Cuomo, C.A., Zeng, Q., Wortman, J.,  
876 Young, S.K., et al. (2014). Pilon: an integrated tool for comprehensive microbial variant detection and  
877 genome assembly improvement. *PLoS One* *9*, e112963.
- 878 Wang, Q., Garrity, G.M., Tiedje, J.M., and Cole, J.R. (2007). Naive Bayesian classifier for rapid assignment of  
879 rRNA sequences into the new bacterial taxonomy. *Appl. Environ. Microbiol.* *73*, 5261–5267.
- 880 Weigel, D. (2012). Natural variation in *Arabidopsis*: from molecular genetics to ecological genomics. *Plant*  
881 *Physiol.* *158*, 2–22.
- 882 Wichmann, G., Ritchie, D., Kousik, C.S., and Bergelson, J. (2005). Reduced genetic variation occurs among  
883 genes of the highly clonal plant pathogen *Xanthomonas axonopodis* pv. *vesicatoria*, including the  
884 effector gene *avrBs2*. *Appl. Environ. Microbiol.* *71*, 2418–2432.
- 885 Wiehlmann, L., Wagner, G., Cramer, N., Siebert, B., Gudowius, P., Morales, G., Köhler, T., van Delden, C.,  
886 Weinel, C., Slickers, P., et al. (2007). Population structure of *Pseudomonas aeruginosa*. *Proc. Natl.*  
887 *Acad. Sci. U. S. A.* *104*, 8101–8106.
- 888 Woolhouse, M.E., Taylor, L.H., and Haydon, D.T. (2001). Population biology of multihost pathogens. *Science*  
889 *292*, 1109–1112.
- 890 Xin, X.-F., Nomura, K., Aung, K., Velásquez, A.C., Yao, J., Boutrot, F., Chang, J.H., Zipfel, C., and He, S.Y.  
891 (2016). Bacteria establish an aqueous living space in plants crucial for virulence. *Nature* *539*, 524–529.
- 892 Yoshida, K., Schuenemann, V.J., Cano, L.M., Pais, M., Mishra, B., Sharma, R., Lanz, C., Martin, F.N., Kamoun, S.,  
893 Krause, J., et al. (2013). The rise and fall of the *Phytophthora infestans* lineage that triggered the Irish  
894 potato famine. *eLife* *2*, e00731.
- 895 Yoshida, K., Burbano, H.A., Krause, J., Thines, M., Weigel, D., and Kamoun, S. (2014). Mining Herbaria for Plant  
896 Pathogen Genomes: Back to the Future. *PLoS Pathog.* *10*, e1004028.
- 897 Yunis, H., Bashan, Y., Okon, Y., Henis, Y., and Others (1980). Weather dependence, yield losses and control of  
898 bacterial speck of tomato caused by *Pseudomonas tomato*. *Plant Dis.* *64*, 937–939.
- 899 Zhu, Y., Chen, H., Fan, J., Wang, Y., Li, Y., Chen, J., Fan, J., Yang, S., Hu, L., Leung, H., et al. (2000). Genetic  
900 diversity and disease control in rice. *Nature* *406*, 718–722.

901  
902

902 **Supplemental Information**

903

904 Table S1. Collection Locations and dates for all samples.

905 Table S2. Genes annotated in plant-associated pathways and amino acid sequence of flg22 variants in OTU5.

906 Fig. S1. Changes in *Pseudomonas* populations colonizing *A. thaliana* leaves.

907 Fig. S2. *Pseudomonas* OTUs and whole-genome phylogeny.

908 Fig. S3. *De novo* genome assembly of 1,524 strains sequenced in this study.

909 Fig. S4. Leaf-endophytic *Pseudomonas* diversity at Eyach site: overlap between amplicon sequencing and strain  
910 isolation data.

911 Fig. S5. Gnotobiotic trial with OTU5 strains.

912 Fig. S6. Toxin and phytohormone distribution.

913

914 **Table S1. Collection Locations and dates for all samples.**

915

| Site  | Latitude            | Longitude         | Sample type               |
|-------|---------------------|-------------------|---------------------------|
| EY    | 48.446111           | 8.781611          | 16S, metagenome, isolates |
| K6911 | 48.541278           | 9.0925            | 16S                       |
| PFN   | 48.561087           | 9.109294          | 16S                       |
| JUG   | 48.555722/48.556255 | 9.134833/9.135424 | 16S, metagenome, isolates |
| WH    | 48.506827           | 8.936418          | 16S                       |
| ERG   | 48.495362           | 8.809083          | 16S                       |

916

917

918 **Table S2. Genes annotated in plant-associated pathways and amino acid sequence of**

919 **flg22 variants in OTU5.**Top: The listed genes (right column) were custom-annotated in each of the  
 920 genomes to ascertain the presence of the listed pathway (left column). Bottom: Left column lists the genome  
 921 from which flg22 sequence was extracted. OTU5 encodes two major variants of flg22, one similar to a *P.*  
 922 *floridiae* genotype, and the other to a *P. viridiflava* genotype.

923

| Pathway            | Components                                                                                      |
|--------------------|-------------------------------------------------------------------------------------------------|
| Coronatine         | <i>cfa1, cfa2, cfa3, cfa4, cfa5, cfa6, cfa7, cfa8, cfa9, cmaA, cmaB, cmaC, cmaD, cmaE, cmaT</i> |
| Mangotoxin         | <i>mboA, mboB, mboC, mboD, mboE, mboF</i>                                                       |
| Phaseolotoxin      | <i>argK, amtA</i>                                                                               |
| Syringomycin       | <i>syrB1, syrB2, syrC, syrD, syrE, syrP</i>                                                     |
| Syringopeptin      | <i>sypA, sypB, sypC</i>                                                                         |
| Tabtoxin           | <i>tblA, tabA, tabB</i>                                                                         |
| Auxin production   | <i>iaaH, iaaM</i>                                                                               |
| Auxin inactivation | <i>iaaL</i>                                                                                     |
| Ethylene           | <i>Efe</i>                                                                                      |

  

| Reference                            | flg22 sequence         |
|--------------------------------------|------------------------|
| Pst DC3000                           | QRLSTGSRINSAKDDAAGLQIA |
| <i>P. floridiae</i> (WP_083186033)   | ERLSTGKKINTAADDAGGSITQ |
| OTU5 (649 isolates)                  | ERLSTGKKINTAADDAGGSITQ |
| <i>P. viridiflava</i> (WP_025995199) | SRLSSGLKVQNARDNVGLSTI  |
| OTU5 (670 isolates)                  | SRLSSGLKVQNARDNVGLSTI  |
| OTU5 (22 isolates)                   | SRLSSGLKVTNARDNVGLSTI  |
| Marinomonas sp                       | QRLSSGKRINSAKDDAAGMQI  |
| OTU5 (3 isolates)                    | QKLSSGKSITSSKDNAAGSQIA |

924

925

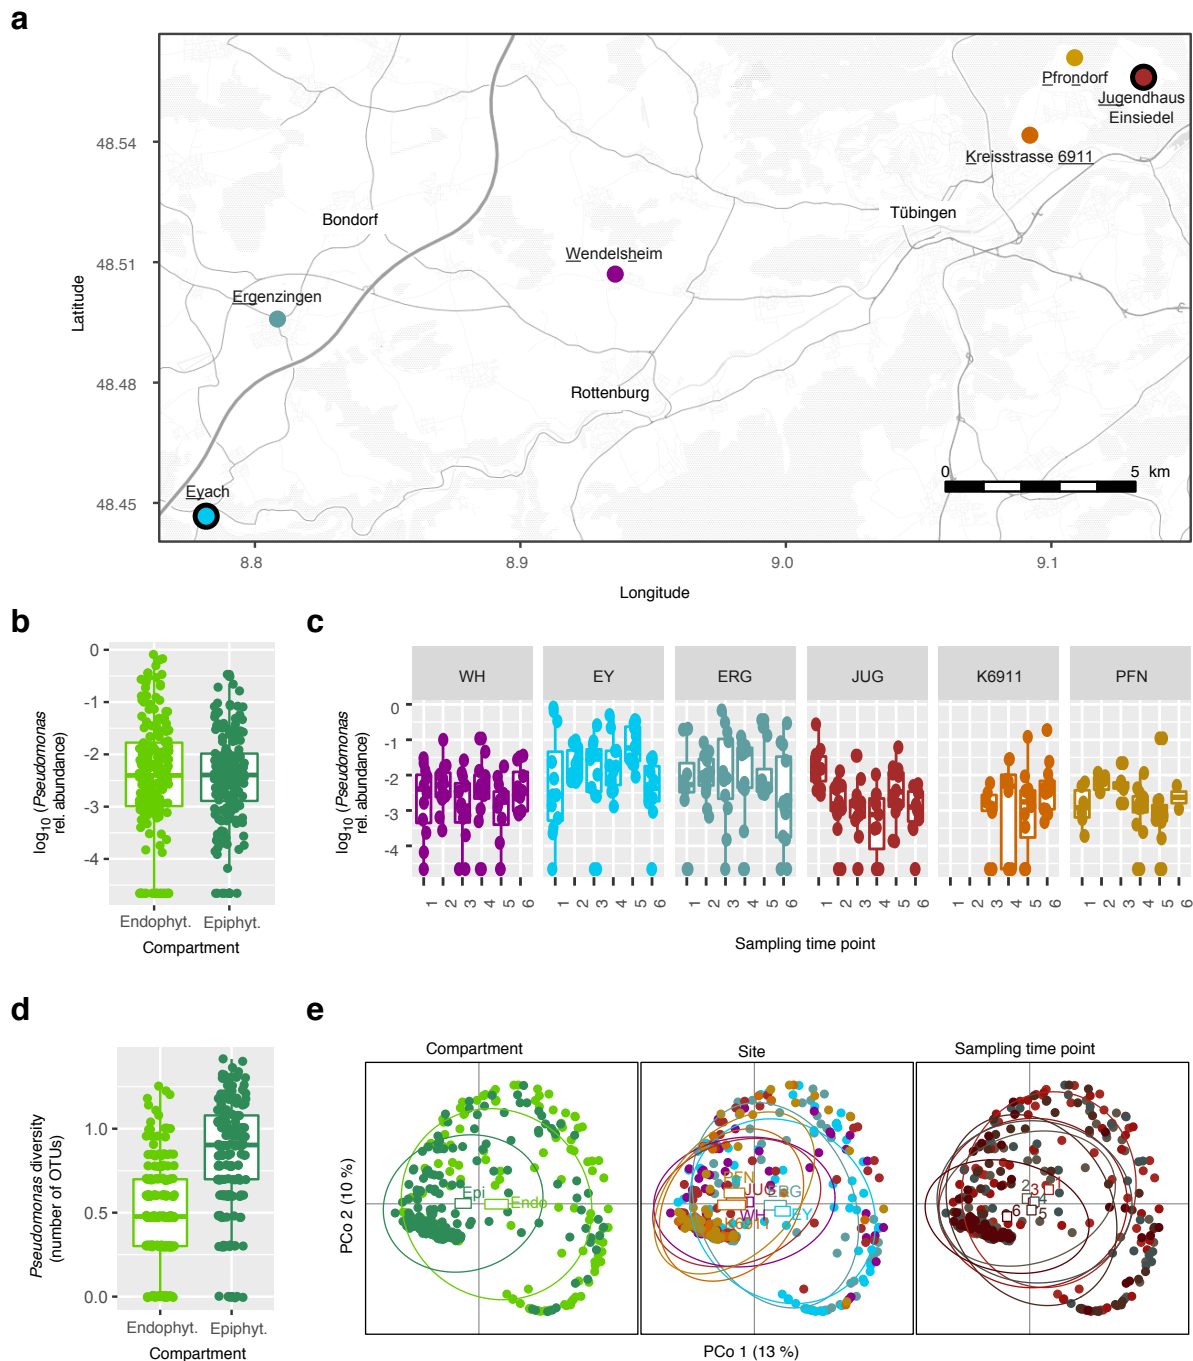

926

927 **Fig. S1. Changes in *Pseudomonas* populations colonizing *A. thaliana* leaves.** (a) Location of the  
928 sampling sites around Tübingen (Germany). The two sites from which isolates were cultured indicated by black  
929 outlines. (b) *Pseudomonas* abundance in the endophytic (Endo.) and epiphytic (Epi.) compartments. (c)  
930 *Pseudomonas* abundance across the different sites and sampling time points (see Fig. 1a). (d) *Pseudomonas*  
931 diversity in the endophytic (Endo.) and epiphytic (Epi.) compartments. (e) Principal coordinates analysis (PCoA)  
932 based on Bray-Curtis distances, depicting the differences between *Pseudomonas* populations across the different  
933 compartments, sites and sampling time points. *Pseudomonas* relative abundance (RA) was calculated as the ratio  
934 of *Pseudomonas* reads to the total number of bacterial reads. Related to Fig. 1.

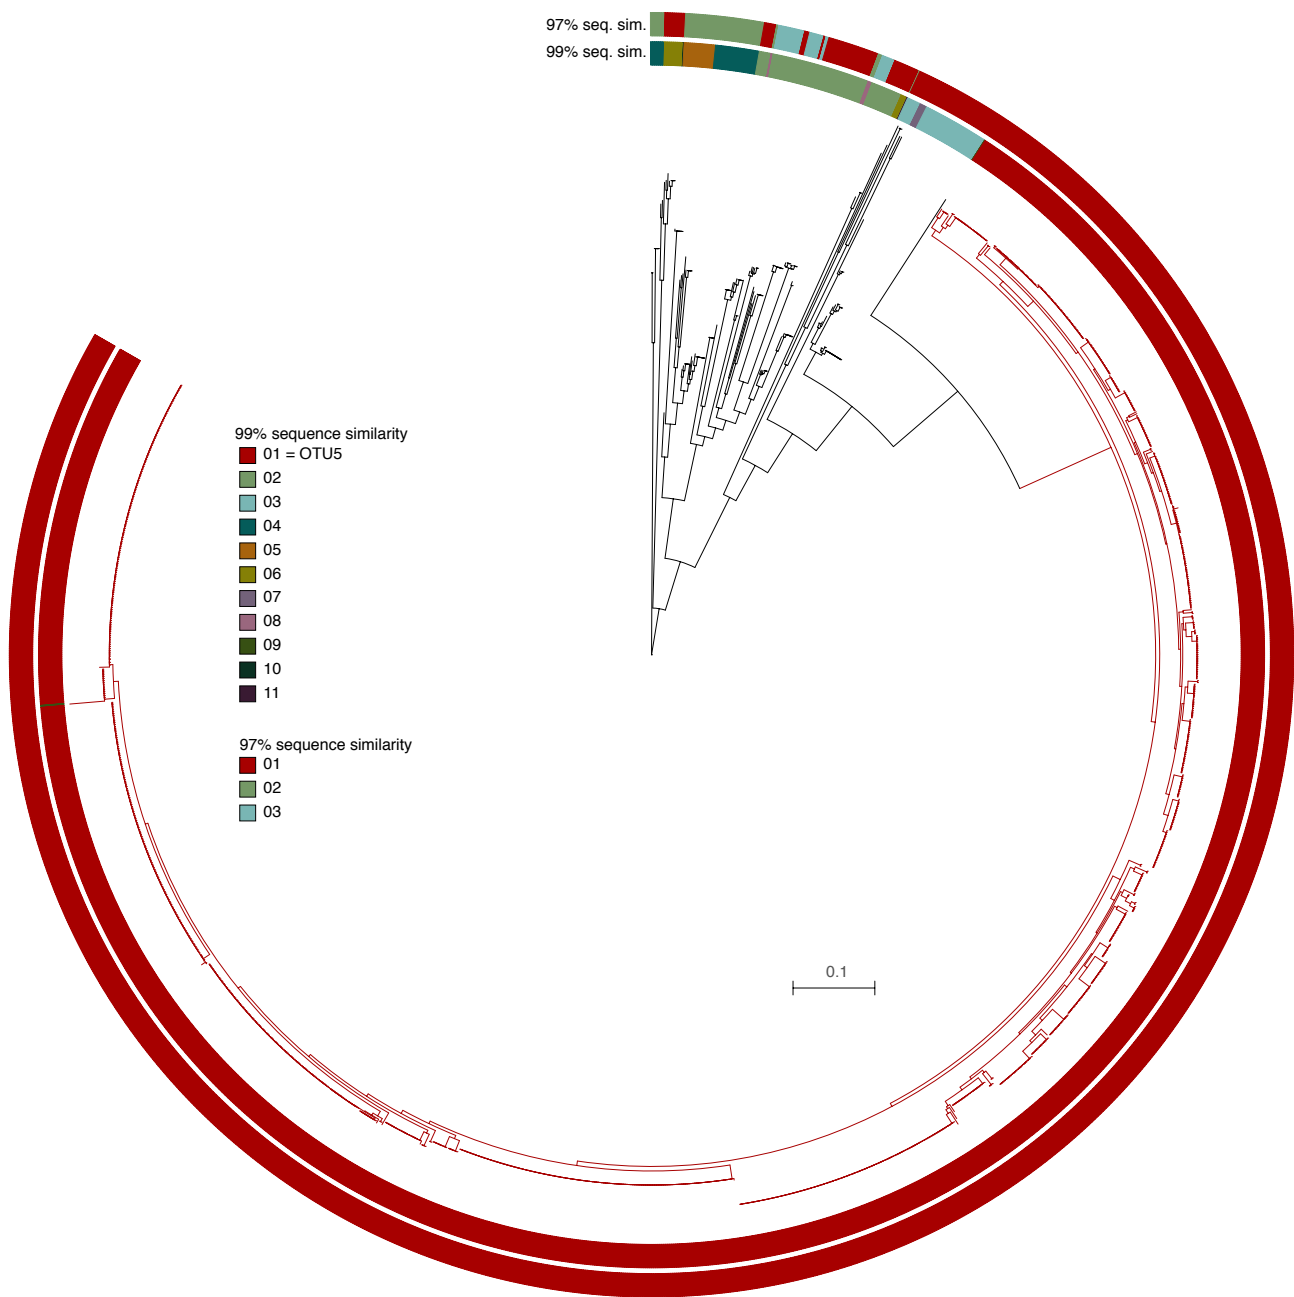

935

936 **Fig. S2. *Pseudomonas* OTUs and whole-genome phylogeny.** 16S rDNA sequences were extracted  
937 from 1,524 *Pseudomonas* isolates with whole-genome sequences. Clustering based on 99% or 97% sequence  
938 similarity of the v3-v4 region of the 16S rDNA is compared to an ML core genome phylogenetic tree. Colors  
939 indicate group, ranked by abundance. The most abundant group corresponds to OTU5 (Bordeaux color), with  
940 clustering at 99% sequence identity being more consistent with the core genome tree than 97% clustering.  
941 Related to Fig. 1, 2 and 3.

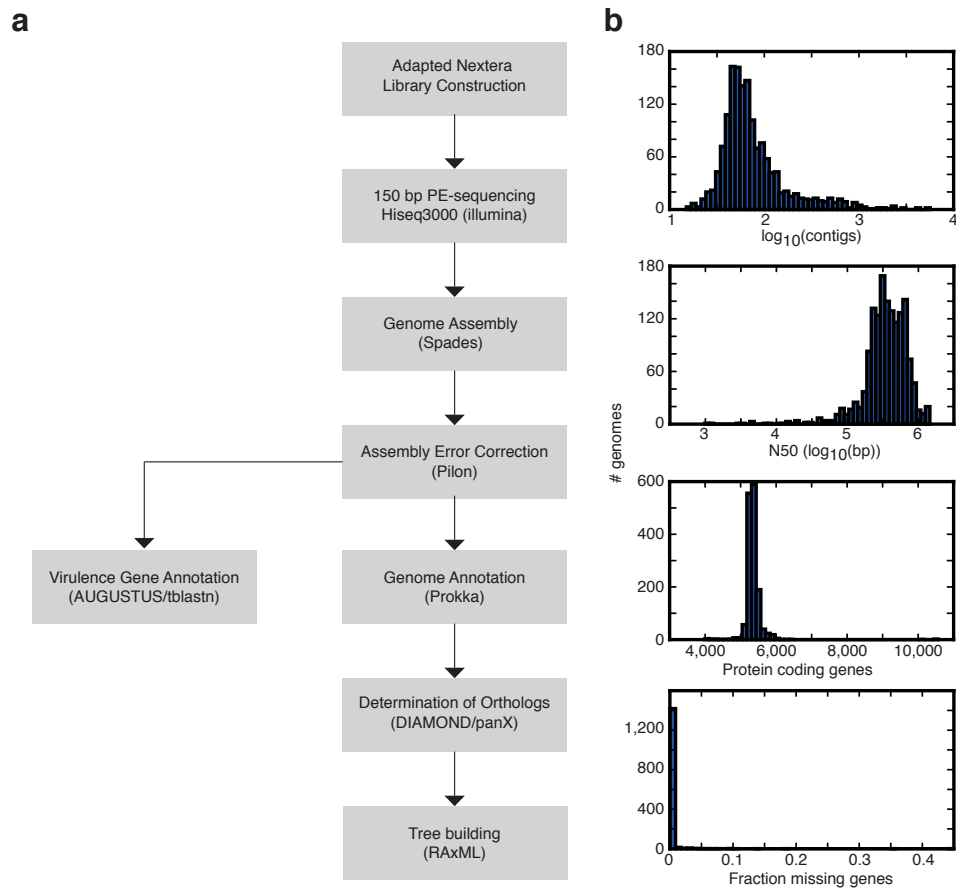

942

943 **Fig. S3. De novo genome assembly of 1,524 strains sequenced in this study.** Genomes were  
944 filtered for basic assembly quality (N50>25,000bp, and more than 3500 genes per genome). The number of  
945 contigs in the assembled genome (a) the N50 for each assembly (b) the number of protein coding genes  
946 annotated per genome (c) and the percentage of genes predicted to be missing per assembly (d) are shown for  
947 the 1,524 genomes remaining after filtering. Related to Fig. 4.



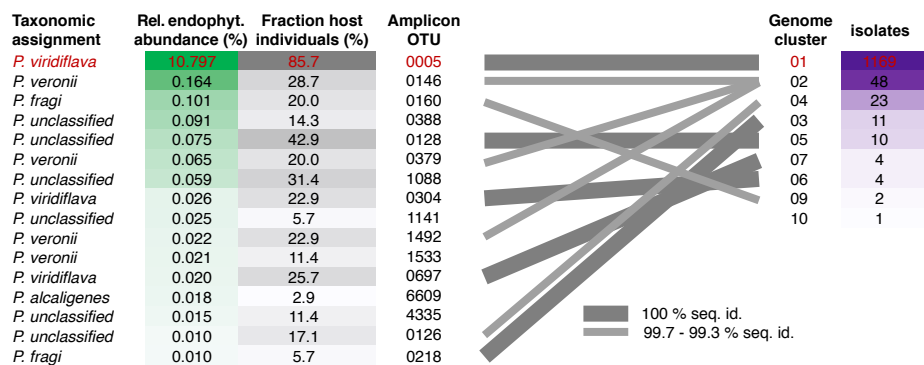

948

949 **Fig. S4. Leaf-endophytic *Pseudomonas* diversity at Eyach site: overlap between amplicon**  
 950 **sequencing and strain isolation data.** Memberships in strain clusters identified by 99% sequence  
 951 similarity of the 16S rDNA v3-v4, either through amplicon sequencing (OTUs, left) or strain isolation  
 952 (genomes, right). Matching groups (grey lines) were identified by comparing representative sequences for the  
 953 amplicon OTUs/genome clusters. Even when considering data from different host individuals sampled at  
 954 different times there is a good overlap between the two collections. Related to Fig. 5.

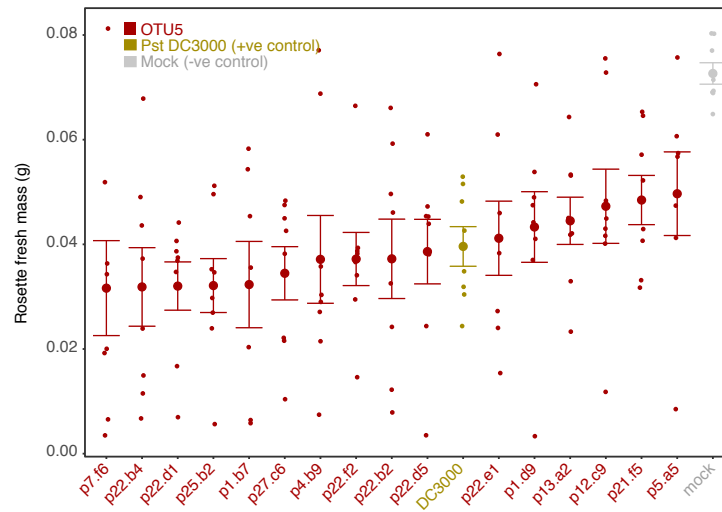

955

956 **Fig. S5. Gnotobiotic trial with OTU5 strains.** 14 day old *A. thaliana* plants of accession Eyach 15-2  
957 were drip-infected with different OTU5 strains. All tested strains significantly reduced plant growth (n=8  
958 replicates per sample, Student's t-test, q-value<0.05). Related to Fig. 3c.

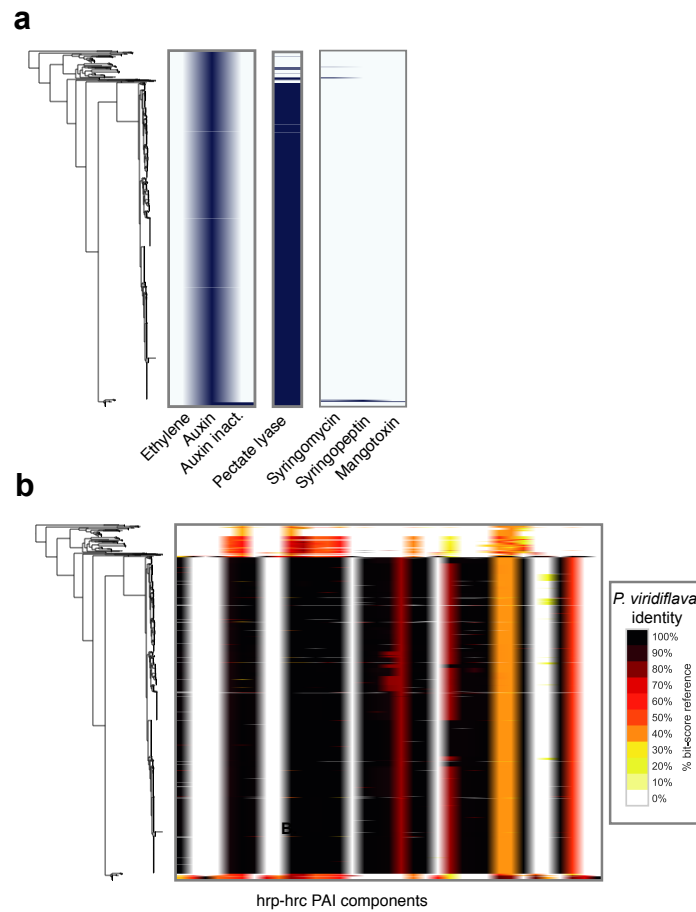

959

960 **Fig. S6. Toxin and phytohormone distribution.** Toxins and phytohormones were annotated in the  
961 1,524 genomes with a custom database and the genetic elements described in Table S2. Related to Fig. 6.
